# Supplementary material for: Analysis of error profiles in deep next-generation sequencing data
Source: Genome Biol. 2019 Mar 14;20:50. doi: 10.1186/s13059-019-1659-6 (PMC6417284; doi:10.1186/s13059-019-1659-6)
Supplement: Supplementary file 1 — Supplementary Tables S1-S5. Table S1. Datasets used. Information provided includes data type, provider, analysis type, target region size, sequencing depth, dilution ratio, and sequencer. Table S2a. Designed 19 substitution markers in COLO829 experiment (HiSeq+Kapa Enzyme; StJude dataset). Listed are chromosome, position (hg19), mutation context, ploidy for each mutations. Also listed are the MAF, mutant allele counts (Mut), total coverage (Tot) for each replicate of each lane output for Normal, Tumor, and two dilutions (1:1000 and 1:5000). For ploidy, 4v4 means 4 out of 4 allels are mutated in cancer cells, 2v4 means 2 out of 4 allele are mutated; 1v4 means 1 out of 4 alleles are mutated; 4v6 means 4 out of 6 alleles are mutated; 1v2 means 1 out of 2 alleles are mutated. The allele counts by CleanLens are based on Phred score cutoff 38. *: BRAF V600E. Table S2b. Designed 19 substitution markers in COLO829 experiment (NovaSeq with Kapa enzyme; StJude dataset). Listed are chromosome, position (hg19), mutation context, ploidy for each mutations. Also listed are the MAF, mutant allele counts (Mut), total coverage (Tot) for each replicate of each lane output for Normal, Tumor, and two dilutions (1:1000 and 1:5000). For ploidy, 4v4 means 4 out of 4 allels are mutated in cancer cells, 2v4 means 2 out of 4 allele are mutated; 1v4 means 1 out of 4 alleles are mutated; 4v6 means 4 out of 6 alleles are mutated; 1v2 means 1 out of 2 alleles are mutated. The CleanLens allele counts based on Phred score cutoff 30. *: BRAF V600E. Table S2c. Designed 19 substitution markers in COLO829 experiment (NovaSeq with Q5 enzyme; StJude dataset). Listed are chromosome, position (hg19), mutation context, ploidy for each mutations. Also listed are the MAF, mutant allele counts (Mut), total coverage (Tot) for each replicate of each lane output for Normal, Tumor, and two dilutions (1:1000 and 1:5000). For ploidy, 4v4 means 4 out of 4 allels are mutated in cancer cells, 2v4 means 2 out of 4 alle [file 13059_2019_1659_MOESM1_ESM.xlsx]

## Sheet: S1
Table S1. Datasets used. Information provided includes data type, provider, analysis type, target region size, sequencing depth, dilution ratio, and sequencer.
data type	ultra-deep sequencing				hybridization capture	aggregated whole- genome sequencing	whole-exome sequencing
providera	StJude (Memphis, TN)		HAIB (Huntsville, AL)		WuXiNextCode (WuXi, China)	HAIB (Huntsville, AL)	BI (Cambridge, MA) and BCM (Houston, TX)
analysis	site-specific sequencing error (as low as 10-5)				sample-level damage	PCR-cycle effectc	Error profile in additional sequencing centersd
target-region size	~2,500 bp				~100,000 bp	whole genome	~ 33 Mb
sequencing depth	>1,000,000X				50,000X	30X	100X to 200X
sample	matched cancer/normal cell lines COLO829 and COLO829BLb				47 bone marrow samples	1663 blood samples	220 + 22 germline samples
dilution (% cancer)	0	0.0002	0.001	1	NA	NA	NA
sequencer	HiSeq 2500/NovaSeq				HiSeq X Ten	HiSeq X Ten	HiSeq2000/GAII
a StJude=St. Jude Children’s Research Hospital, Comp. Bio. Genomics Lab, Memphis, TN; HAIB= Genomic Services Lab, HudsonAlpha Institute of Biotechnology, Huntsville, AL; WuXiNextCode=WuXi NextCODE Company, WuXi, China (https://www.wuxinextcode.com/); BI=Broad Institute, Cambridge, MA; BCM=Baylor College of Medicine, Houston, TX
b COLO829 (ATCC # CRL-1974TM) and COLO829BL (ATCC # CRL-1980TM) were cultured from the same melanoma patient
c The aggregated whole-genome sequencing (PCR-free) data were contrasted with hybridization capture data
d This dataset was generated in 2010 and 2012 (https://ocg.cancer.gov/programs/target/data-matrix)

## Sheet: S2 a
Table S2a. Designed 19 substitution markers in COLO829 experiment (HiSeq+Kapa Enzyme; StJude dataset). Listed are chromosome, position (hg19), mutation context, ploidy for each mutations. Also listed are the MAF, mutant allele counts (Mut), total coverage (Tot) for each replicate of each lane output for Normal, Tumor, and two dilutions (1:1000 and 1:5000). For ploidy, 4v4 means 4 out of 4 allels …
						Normal (COLO829BL)			Tumor (COLO829)			Tumor:Normal=1:1000						Tumor:Normal=1:5000
												Rep1			Rep2			Rep1			Rep2
Chr	Pos (hg19)	Ref	Mut	Context	Ploidy	MAF	Mut	Tot	MAF	Mut	Tot	MAF	Mut	Tot	MAF	Mut	Tot	MAF	Mut	Tot	MAF	Mut	Tot
chr1	196928281	C	T	T(C>T)A	4v4	0.000142657	6	42059	0.99902	25498	25523	0.00289316	737	254739	0.00212399	374	176084	0.000703833	667	947668	0.000599105	450	751120
chr1	231858494	C	T	C(C>T)C	4v4	0.000217759	22	101029	0.998284	64003	64113	0.00201758	1529	757838	0.00166205	1177	708160	0.000550264	1421	2582395	0.000382081	977	2557049
chr1	154002369	T	C	T(T>C)A	4v4	0.000199906	31	155073	0.998435	72095	72208	0.00214938	2266	1054257	0.00177767	1915	1077254	0.000376548	1228	3261205	0.000477278	1044	2187403
chr1	206730949	G	A	A(G>A)G	4v4	0.000203243	28	137766	0.998322	88043	88191	0.00229656	2150	936181	0.0024822	2007	808556	8.94069e-05	284	3176488	0.00050015	1604	3207038
chr1	210329076	C	T	T(C>T)C	4v4	0.000193974	39	201058	0.998204	88943	89103	0.00272115	4229	1554122	0.0026661	4169	1563707	0.000471969	2280	4830821	0.000641037	2074	3235382
chr1	179604984	T	C	A(T>C)T	4v4	0.00014609	11	75296	0.998621	46359	46423	0.00289763	1463	504896	0.00267966	1343	501183	0.000955263	2056	2152286	0.00099072	878	886224
chr1	168105565	G	A	T(G>A)G	2v4	0.000168309	27	160419	0.493382	47193	95652	0.000822963	573	696265	0.00128459	961	748099	0.000297533	970	3260148	0.000229794	789	3433516
chr1	166991079	C	G	T(C>G)T	2v4	0.00010051	15	149239	0.478104	45909	96023	0.00154587	1756	1135929	0.00151693	1367	901160	7.23272e-05	251	3470342	0.000208093	618	2969824
chr1	203055000	G	A	C(G>A)A	2v4	0	0	2971	0.492289	1213	2464	0.0012966	24	18510	0.000749574	11	14675	0.000824657	48	58206	0.000580108	38	65505
chr1	155264487	C	T	C(C>T)C	2v4	0.000345901	1	2891	0.477341	1580	3310	0.00113389	39	34395	0.000887002	28	31567	2.38636e-05	4	167619	0.000229821	32	139239
chr1	155300719	C	T	C(C>T)T	2v4	2.98579e-05	1	33492	0.500673	12641	25248	0.000892667	214	239731	0.00142662	292	204679	0.000184717	143	774157	0.000154862	99	639279
chr1	153391771	G	T	T(G>T)G	2v4	0.000282859	6	21212	0.520705	7620	14634	0.00110678	172	155406	0.00182538	235	128740	0.000418425	217	518611	6.01521e-05	29	482111
chr1	154128614	A	C	C(A>C)G	2v4	0	0	3424	0.504202	720	1428	0.00145879	42	28791	0.000792842	14	17658	0.000760709	48	63099	2.98842e-05	2	66925
chr1	150208310	C	G	T(C>G)C	1v4	0	0	3804	0.270843	562	2075	0.000499073	14	28052	0.000833069	21	25208	0.000106261	14	131751	1.68698e-05	2	118555
chr1	177251423	A	G	G(A>G)C	1v4	0.000386241	17	44014	0.261772	8517	32536	0.000877643	282	321315	0.0004166	115	276044	0.000908276	1041	1146128	0.000783112	819	1045827
chr1	197169114	A	C	A(A>C)T	1v4	4.7856e-05	8	167168	0.237739	25245	106188	0.000246296	286	1161206	0.0010671	1157	1084252	0.000132931	485	3648507	9.93576e-06	41	4126509
chr4	4419363	T	C	C(T>C)A	1v2	0.000207406	15	72322	0.496208	15312	30858	0.000547062	290	530104	0.00056326	277	491780	0.000167807	324	1930795	0.000362437	707	1950686
chr4	48501625	G	A	G(G>A)A	1v2	0.000202347	2	9884	0.527745	2682	5082	0.000382964	33	86170	0.000912088	57	62494	0.000112523	34	302160	0.000102017	34	333278
chr7	140453136	A	T	C(A>T)C	4v6*	0.000123949	11	88746	0.654046	42201	64523	0.0017899	1285	717917	0.00183244	1332	726899	0.000403386	785	1946026	0.00050469	1105	2189464

## Sheet: S2 b
Table S2b. Designed 19 substitution markers in COLO829 experiment (NovaSeq with Kapa enzyme; StJude dataset). Listed are chromosome, position (hg19), mutation context, ploidy for each mutations. Also listed are the MAF, mutant allele counts (Mut), total coverage (Tot) for each replicate of each lane output for Normal, Tumor, and two dilutions (1:1000 and 1:5000). For ploidy, 4v4 means 4 out of 4 …
						Normal (COLO829BL)			Tumor (COLO829)			Tumor:Normal=1:1000						Tumor:Normal=1:5000
												Rep1			Rep2			Rep1			Rep2
Chr	Pos (hg19)	Ref	Mut	Context	Ploidy	MAF	Mut	Tot	MAF	Mut	Tot	MAF	Mut	Tot	MAF	Mut	Tot	MAF	Mut	Tot	MAF	Mut	Tot
chr1	196928281	C	T	T(C>T)A	4v4	3.16868e-05	6	189353	0.999907	54035	54040	0.00238093	1661	697627	0.00180272	1565	868133	0.000592669	2525	4260385	0.000517191	1727	3339195
chr1	231858494	C	T	C(C>T)C	4v4	1.51259e-05	5	330558	0.999885	104218	104230	0.00193645	3403	1757342	0.00153372	3753	2446987	0.000485172	4288	8838103	0.000355145	2989	8416271
chr1	154002369	T	C	T(T>C)A	4v4	9.38759e-05	28	298266	0.999936	77604	77609	0.00226659	3353	1479312	0.00190203	4579	2407429	0.000403899	2865	7093358	0.000542059	2372	4375909
chr1	206730949	G	A	A(G>A)G	4v4	8.17892e-05	31	379023	0.999631	140749	140801	0.00231887	4516	1947503	0.0025422	6822	2683498	6.34174e-05	613	9666116	0.000464171	4493	9679615
chr1	210329076	C	T	T(C>T)C	4v4	3.1689e-05	6	189340	0.999849	39705	39711	0.00264749	2881	1088201	0.00268521	4227	1574178	0.000433456	2168	5001659	0.000621746	1764	2837173
chr1	179604984	T	C	A(T>C)T	4v4	3.91321e-05	11	281099	0.999879	98814	98826	0.0031592	4058	1284501	0.00302274	6069	2007779	0.00107227	8622	8040914	0.000981345	3160	3220069
chr1	168105565	G	A	T(G>A)G	2v4	0.000139848	27	193067	0.492553	29134	59149	0.000799824	552	690152	0.00127654	1296	1015242	0.000300649	1443	4799617	0.000223455	954	4269309
chr1	166991079	C	G	T(C>G)T	2v4	0	0	355615	0.492547	59017	119820	0.00151802	2702	1779946	0.00153065	3624	2367621	6.52542e-05	576	8827017	0.000222603	1562	7016967
chr1	203055000	G	A	C(G>A)A	2v4	0.000315806	2	6333	0.499808	1302	2605	0.000967222	27	27915	0.000770165	26	33759	0.000712245	90	126361	0.000484401	69	142444
chr1	155264487	C	T	C(C>T)C	2v4	2.66372e-05	2	75083	0.495376	24370	49195	0.000990687	557	562236	0.000957838	826	862359	3.06599e-05	134	4370529	0.000172408	596	3456909
chr1	155300719	C	T	C(C>T)T	2v4	1.49411e-05	3	200788	0.491404	38244	77826	0.000789606	781	989101	0.00122394	1746	1426541	0.000150863	718	4759291	0.000125508	479	3816475
chr1	153391771	G	T	T(G>T)G	2v4	3.45614e-05	7	202538	0.502399	36435	72522	0.000956335	1019	1065526	0.0016001	2348	1467411	0.000399985	2133	5332700	2.98745e-05	144	4820167
chr1	154128614	A	C	C(A>C)G	2v4	0	0	19871	0.529984	2722	5136	0.00135748	170	125232	0.000716159	86	120085	0.000509403	217	425989	0.000111704	46	411804
chr1	150208310	C	G	T(C>G)C	1v4	0	0	90956	0.253752	7050	27783	0.000556055	241	433410	0.000910232	593	651482	0.000126354	399	3157788	3.02905e-06	8	2641090
chr1	177251423	A	G	G(A>G)C	1v4	0.000340601	83	243687	0.253738	23675	93305	0.000708033	912	1288075	0.000425747	797	1872005	0.000874948	6215	7103278	0.000740995	4572	6170083
chr1	197169114	A	C	A(A>C)T	1v4	1.29881e-05	5	384968	0.243557	31784	130499	0.000250912	517	2060483	0.00112757	3364	2983412	0.00012179	1164	9557400	4.91373e-06	49	9972062
chr4	4419363	T	C	C(T>C)A	1v2	0.000165089	18	109032	0.506859	14226	28067	0.000593174	318	536099	0.000653834	503	769308	0.000219211	640	2919566	0.000387508	1045	2696718
chr4	48501625	G	A	G(G>A)A	1v2	5.96904e-05	8	134025	0.518833	19284	37168	0.000396681	303	763838	0.00082516	763	924669	8.15526e-05	332	4070990	6.24259e-05	278	4453283
chr7	140453136	A	T	C(A>T)C	4v6*	1.94831e-05	5	256633	0.667105	66978	100401	0.00189889	2708	1426093	0.00186769	4448	2381553	0.000394459	2497	6330191	0.000475982	3170	6659916

## Sheet: S2 c
Table S2c. Designed 19 substitution markers in COLO829 experiment (NovaSeq with Q5 enzyme; StJude dataset). Listed are chromosome, position (hg19), mutation context, ploidy for each mutations. Also listed are the MAF, mutant allele counts (Mut), total coverage (Tot) for each replicate of each lane output for Normal, Tumor, and two dilutions (1:1000 and 1:5000). For ploidy, 4v4 means 4 out of 4 al…
						Normal (COLO829BL)			Tumor (COLO829)			Tumor:Normal=1:1000						Tumor:Normal=1:5000
												Rep1			Rep2			Rep1			Rep2
Chr	Pos (hg19)	Ref	Mut	Context	Ploidy	MAF	Mut	Tot	MAF	Mut	Tot	MAF	Mut	Tot	MAF	Mut	Tot	MAF	Mut	Tot	MAF	Mut	Tot
chr1	196928281	C	T	T(C>T)A	4v4	4.29322e-05	25	582313	0.999922	152865	152877	0.00429841	12624	2936900	0.00358356	15718	4386145	0.00103035	13108	12721851	0.000452892	7060	15588701
chr1	231858494	C	T	C(C>T)C	4v4	1.90473e-05	8	420007	0.999942	138984	138992	0.00235454	5237	2224212	0.00279001	9232	3308954	0.00103524	9318	9000839	0.000346521	3548	10238903
chr1	154002369	T	C	T(T>C)A	4v4	0.000113841	32	281093	0.999941	67957	67961	0.00209416	13589	6488988	0.00132046	1628	1232908	0.00102343	5162	5043803	8.00064e-05	398	4974603
chr1	206730949	G	A	A(G>A)G	4v4	3.21679e-05	15	466304	0.999841	194966	194997	0.0021308	3701	1736908	0.00468514	15660	3342486	0.000857541	8170	9527245	0.000477304	5369	11248607
chr1	210329076	C	T	T(C>T)C	4v4	3.98611e-05	30	752613	0.999778	292381	292446	0.00346713	17698	5104510	0.00375966	27032	7190009	0.000497907	10507	21102317	0.000240186	6192	25780013
chr1	179604984	T	C	A(T>C)T	4v4	5.54577e-05	25	450794	0.999958	166834	166841	0.00292556	7688	2627870	0.00341884	11073	3238815	0.000777608	6926	8906807	0.000631749	6334	10026129
chr1	168105565	G	A	T(G>A)G	2v4	5.98531e-05	25	417689	0.500044	74498	148983	0.00198187	3801	1917883	0.00126508	3580	2829864	0.000330489	2217	6708239	0.000328643	3061	9314051
chr1	166991079	C	G	T(C>G)T	2v4	6.53373e-06	4	612208	0.49718	107360	215938	0.00141923	4293	3024889	0.0010428	4269	4093790	0.000158068	1873	11849303	0.000670824	10066	15005427
chr1	203055000	G	A	C(G>A)A	2v4	N.D	N.D	N.D	N.D	N.D	N.D	N.D	N.D	N.D	N.D	N.D	N.D	N.D	N.D	N.D	N.D	N.D	N.D
chr1	155264487	C	T	C(C>T)C	2v4	2.96431e-05	8	269877	0.499547	41376	82827	0.00127282	1660	1304192	0.00216601	3474	1603870	3.56153e-05	177	4969773	0.000225669	1434	6354444
chr1	155300719	C	T	C(C>T)T	2v4	1.53973e-05	6	389679	0.483973	61527	127129	0.001374	2742	1995640	0.00216686	5592	2580689	0.000191573	1531	7991731	1.70999e-05	157	9181335
chr1	153391771	G	T	T(G>T)G	2v4	1.4497e-05	4	275919	0.492491	54305	110266	0.00162015	2824	1743046	0.00305483	7245	2371651	0.000389735	2692	6907261	0.000908155	7156	7879708
chr1	154128614	A	C	C(A>C)G	2v4	7.38722e-06	1	135369	0.525978	34218	65056	0.0022384	1551	692906	0.00206145	2420	1173930	0.000531125	1686	3174396	2.53142e-05	111	4384892
chr1	150208310	C	G	T(C>G)C	1v4	1.48959e-05	3	201398	0.250242	12911	51594	0.00079446	802	1009491	0.000857428	1164	1357549	6.72799e-06	24	3567189	4.18447e-06	19	4540596
chr1	177251423	A	G	G(A>G)C	1v4	0.000164892	45	272906	0.249604	27573	110467	0.00146042	2255	1544078	0.00138829	2469	1778446	0.000185687	967	5207701	0.000169084	1051	6215845
chr1	197169114	A	C	A(A>C)T	1v4	0	0	433100	0.247146	31738	128418	0.00177429	3569	2011505	0.00154819	3933	2540386	0.000137062	1205	8791648	3.3895e-06	35	10326022
chr4	4419363	T	C	C(T>C)A	1v2	0.000123919	21	169466	0.507135	15957	31465	0.000849341	671	790024	0.00175707	1808	1028988	0.00111363	3651	3278458	0.000119882	428	3570181
chr4	48501625	G	A	G(G>A)A	1v2	4.20089e-05	11	261849	0.498599	33990	68171	0.00043669	617	1412900	0.000499526	1085	2172059	0.000672888	3654	5430328	2.0758e-05	135	6503513
chr7	140453136	A	T	C(A>T)C	4v6*	7.80366e-06	1	128145	0.670363	12997	19388	0.00311962	977	313179	0.00119846	707	589926	0.000509138	17470	34312879	0.000879428	3090	3513648

## Sheet: S2 d
Table S2d, Primers for the 19 substitution markers for COLO829 experiment
Gene	Chr	Pos (hg19)	Ref	Mut	Forward Primer	Reverse Primer
CFHR2	chr1	196928281	C	T	TGGTATATCCCAGTTGTGAAGAAAAA	TGCATTTTCACAAATCAACACAAA
DISC1	chr1	231858494	C	T	ACCCACGTGGAAGAATACGC	AACGCATGGGAGAAACGGTA
NUP210L	chr1	154002369	T	C	AAGCTCTTTGTTGATGGTAAGAGAAT	CAGTATCAAGGTCACTGTTCACTGC
RASSF5	chr1	206730949	G	A	ATGACCGTGGACAGCAGCAT	CACGAAAGGCTCCTGCATTC
MYOG	chr1	203055000	G	A	CCAGCCCCTTGTCCTCAA	CTACCAGGAACCCCGCTTCTA
SYT14	chr1	210329076	C	T	CCTAATCCAAATAAACATGGCATAACA	CTGAGCCATGTTCAAGAGACTG
TDRD5	chr1	179604984	T	C	TCCCACCATTAGACACCAGTTCC	CAACAGACTCCTACCGCATTTCA
GPR161	chr1	168105565	G	A	CTCACCTGGTCCTCACGGATT	CTAAACAGTCCGCTGGATGGG
MAEL	chr1	166991079	C	G	CAGCAATATCCACAAATTCTCCAAC	TGACTGTAGTAAGAAGGAAGTTGGGC
PKLR	chr1	155264487	C	T	AAGCGCAGGTCTCGGACG	GCAGCTGGCTCTTTCCATGTC
RUSC1	chr1	155300719	C	T	TCTTCATCCATAAGTGGACTGTGC	GTGTCCAGGCTTCAGCACCT
S100A7A	chr1	153391771	G	T	GAGTTTCTGTCCTTGCTGGGAG	GAAGAAATAAGGCAAGTGTCTGGTG
TPM3	chr1	154128614	A	C	CAACATGGTGAAGCCCTGTCT	GGAGCGTAATGGCTCGATCTC
ANP32E	chr1	150208310	C	G	GGAACGCAAATATAAACGCCCA	GCGTGCGTGCGTGTGTGT
FAM5B	chr1	177251423	A	G	GGTCCCTTCAGAGCTCCTTTC	GGTGGTTGGAGCAGATTAACAA
ZBTB41	chr1	197169114	A	C	GAAAAGGGGCAACATTTTCGT	CACCCTGGATCACGTAACACAT
D4S234E	chr4	4419363	T	C	CTTCTGTTTGCTAATGCTGCTTTG	TTTACAGCATCCAATAAATCCCAGT
FRYL	chr4	48501625	G	A	GGCTTCTGACATGTCCAGGTT	GCCCAGTGATATCTTTGGCAGT
BRAF	chr7	140453136	A	T	GCCTCAATTCTTACCATCCACAAA	TGTTTTCCTTTACTTACTACACCTCAGA

## Sheet: S3 a
Table S3a. Mutation counts in pediatric cancers (non-NBL and NBL) and adult cancers (COSMIC v82) are listed in columns C,D,E. For COSMIC data, we also excluded markers with population allele frequency (AF) >=0.1% (from ExAC database with TCGA samples subtracted), and required mutation recurrence (Rec) to be >=1 (columns F, M, S), >=5 (columns G, N, T), and >=10 (columns H, O, U). The number of C>…
		Mutation Counts (Pediatric)		Mutation Counts (COSMIC v82)	Mutation Counts (COSMIC v8; AF<0.001)				Mutation counts (high error rate context)						% high error rate mutations
Context	Error Rate by context	non_NBL	NBL	Adult	Rec >=1	Rec >=5	Rec >=10	helper	nonNBL	NBL	Adult	Adult (AF<0.1%; Rec >=1)	Adult (AF<0.1%; Rec>=5)	Adult (AF<0.1%; Rec>=10)	nonNBL	NBL	Adult	Adult (AF<0.1%; Rec >=1)	Adult (AF<0.1%; Rec>=5)	Adult (AF<0.1%; Rec>=10)
Totals		227496	111236	2747305	2687546	272959	197321		47307	8939	775823	760688	63569	32631	0.207947	0.0803607	0.282394	0.283042	0.232888	0.16537
A(A>C)A	low	792	404	7520	7395	203	81	0	0	0	0	0	0	0
A(A>C)C	low	434	199	3948	3660	217	91	0	0	0	0	0	0	0
A(A>C)G	low	604	249	8571	8493	313	100	0	0	0	0	0	0	0
A(A>C)T	low	499	246	3090	3035	92	34	0	0	0	0	0	0	0
A(A>G)A	low	1151	432	6310	5995	406	162	0	0	0	0	0	0	0
A(A>G)C	low	1101	320	10828	10419	474	168	0	0	0	0	0	0	0
A(A>G)G	low	1207	475	11087	10527	785	461	0	0	0	0	0	0	0
A(A>G)T	low	1568	571	8568	8285	333	125	0	0	0	0	0	0	0
A(A>T)A	low	978	510	4063	4003	139	60	0	0	0	0	0	0	0
A(A>T)C	low	587	275	2523	2446	80	24	0	0	0	0	0	0	0
A(A>T)G	low	916	447	5599	5465	458	386	0	0	0	0	0	0	0
A(A>T)T	low	982	464	4117	4057	107	36	0	0	0	0	0	0	0
A(C>A)A	C>A	2020	1820	9766	9331	500	339	0	0	0	0	0	0	0
A(C>A)C	C>A	1020	815	18503	18257	9916	9787	0	0	0	0	0	0	0
A(C>A)G	C>A	261	183	4734	4595	574	524	0	0	0	0	0	0	0
A(C>A)T	C>A	1446	1094	6444	6362	222	165	0	0	0	0	0	0	0
A(C>G)A	low	935	530	3931	3723	203	104	0	0	0	0	0	0	0
A(C>G)C	low	459	353	5985	5812	2508	2374	0	0	0	0	0	0	0
A(C>G)G	low	294	192	2658	2359	250	215	0	0	0	0	0	0	0
A(C>G)T	low	895	563	4160	4008	177	105	0	0	0	0	0	0	0
A(C>T)A	low	2147	981	12628	12214	1059	761	0	0	0	0	0	0	0
A(C>T)C	low	1197	474	34764	34337	15912	15565	0	0	0	0	0	0	0
A(C>T)G	high	8055	913	67621	66129	9039	6669	1	8055	913	67621	66129	9039	6669
A(C>T)T	low	1791	815	11293	10969	437	196	0	0	0	0	0	0	0
A(G>A)A	low	3043	893	43539	43121	1413	430	0	0	0	0	0	0	0
A(G>A)C	high	1692	610	23596	22830	716	258	1	1692	610	23596	22830	716	258
A(G>A)G	low	2241	829	38543	37981	1604	614	0	0	0	0	0	0	0
A(G>A)T	low	1705	831	11065	10800	375	95	0	0	0	0	0	0	0
A(G>C)A	low	2189	661	19356	19066	333	168	0	0	0	0	0	0	0
A(G>C)C	low	635	329	4151	3941	257	121	0	0	0	0	0	0	0
A(G>C)G	low	588	389	5533	5314	459	367	0	0	0	0	0	0	0
A(G>C)T	low	959	530	4065	3941	145	26	0	0	0	0	0	0	0
A(G>T)A	G>T	2507	3328	24110	24019	563	359	0	0	0	0	0	0	0
A(G>T)C	G>T	1635	1745	12977	12838	219	111	0	0	0	0	0	0	0
A(G>T)G	G>T	1375	1504	19702	19537	524	360	0	0	0	0	0	0	0
A(G>T)T	G>T	1407	1076	8329	8160	129	20	0	0	0	0	0	0	0
A(T>A)A	low	777	389	3190	3123	89	38	0	0	0	0	0	0	0
A(T>A)C	low	618	272	4285	4225	270	124	0	0	0	0	0	0	0
A(T>A)G	low	712	336	4877	4735	380	301	0	0	0	0	0	0	0
A(T>A)T	low	1000	431	4234	4184	135	90	0	0	0	0	0	0	0
A(T>C)A	low	1579	535	10211	9653	789	567	0	0	0	0	0	0	0
A(T>C)C	low	1699	731	7355	7041	492	291	0	0	0	0	0	0	0
A(T>C)G	low	1216	421	13765	12858	1452	1116	0	0	0	0	0	0	0
A(T>C)T	low	1599	554	8546	8154	245	106	0	0	0	0	0	0	0
A(T>G)A	low	430	180	1457	1397	102	68	0	0	0	0	0	0	0
A(T>G)C	low	239	91	2147	2025	142	71	0	0	0	0	0	0	0
A(T>G)G	low	528	262	2726	2606	165	67	0	0	0	0	0	0	0
A(T>G)T	low	451	268	3114	3040	128	81	0	0	0	0	0	0	0
C(A>C)A	low	508	286	2868	2740	188	97	0	0	0	0	0	0	0
C(A>C)C	low	645	210	8850	7531	457	181	0	0	0	0	0	0	0
C(A>C)G	low	712	241	5566	5277	475	296	0	0	0	0	0	0	0
C(A>C)T	low	510	296	2836	2739	209	108	0	0	0	0	0	0	0
C(A>G)A	low	605	241	6939	6530	278	112	0	0	0	0	0	0	0
C(A>G)C	low	732	221	10342	9741	462	190	0	0	0	0	0	0	0
C(A>G)G	low	1431	355	15693	14932	912	578	0	0	0	0	0	0	0
C(A>G)T	low	1233	386	14615	13980	2620	2316	0	0	0	0	0	0	0
C(A>T)A	low	354	226	2916	2859	52	11	0	0	0	0	0	0	0
C(A>T)C	low	467	217	29852	29722	26272	26189	0	0	0	0	0	0	0
C(A>T)G	low	946	400	9465	9276	653	492	0	0	0	0	0	0	0
C(A>T)T	low	695	339	4886	4765	545	439	0	0	0	0	0	0	0
C(C>A)A	C>A	1419	2450	18765	18572	5168	5071	0	0	0	0	0	0	0
C(C>A)C	C>A	942	871	12645	12465	438	237	0	0	0	0	0	0	0
C(C>A)G	C>A	303	272	9855	9617	478	315	0	0	0	0	0	0	0
C(C>A)T	C>A	1350	1496	19488	19337	576	308	0	0	0	0	0	0	0
C(C>G)A	low	537	299	5440	5223	1726	1647	0	0	0	0	0	0	0
C(C>G)C	low	410	306	3686	3566	116	86	0	0	0	0	0	0	0
C(C>G)G	low	218	102	4086	3817	548	458	0	0	0	0	0	0	0
C(C>G)T	low	678	385	5510	5300	280	173	0	0	0	0	0	0	0
C(C>T)A	low	1587	773	36346	35980	3211	2290	0	0	0	0	0	0	0
C(C>T)C	low	1700	619	48027	47544	1836	508	0	0	0	0	0	0	0
C(C>T)G	high	3923	531	73673	71958	5533	3653	1	3923	531	73673	71958	5533	3653
C(C>T)T	low	2218	752	38990	38426	1698	803	0	0	0	0	0	0	0
C(G>A)A	high	3322	438	86848	85915	9997	2871	1	3322	438	86848	85915	9997	2871
C(G>A)C	high	4105	611	80583	78995	4271	1851	1	4105	611	80583	78995	4271	1851
C(G>A)G	high	3842	600	75166	73279	5355	3249	1	3842	600	75166	73279	5355	3249
C(G>A)T	high	7813	919	65675	64131	3741	1410	1	7813	919	65675	64131	3741	1410
C(G>C)A	low	163	95	3662	3472	391	309	0	0	0	0	0	0	0
C(G>C)C	low	220	118	3148	2779	664	589	0	0	0	0	0	0	0
C(G>C)G	low	195	110	3880	3614	242	160	0	0	0	0	0	0	0
C(G>C)T	low	298	187	2555	2425	253	114	0	0	0	0	0	0	0
C(G>T)A	G>T	211	208	6579	6536	393	306	0	0	0	0	0	0	0
C(G>T)C	G>T	237	175	8962	8755	212	52	0	0	0	0	0	0	0
C(G>T)G	G>T	272	288	10704	10387	238	164	0	0	0	0	0	0	0
C(G>T)T	G>T	288	162	6462	6332	154	36	0	0	0	0	0	0	0
C(T>A)A	low	537	258	2647	2612	131	36	0	0	0	0	0	0	0
C(T>A)C	low	659	412	5579	5437	328	247	0	0	0	0	0	0	0
C(T>A)G	low	1036	417	9703	9475	677	485	0	0	0	0	0	0	0
C(T>A)T	low	949	458	5649	5595	399	301	0	0	0	0	0	0	0
C(T>C)A	low	1158	465	5535	5292	276	127	0	0	0	0	0	0	0
C(T>C)C	low	3023	2082	10416	9841	770	406	0	0	0	0	0	0	0
C(T>C)G	low	1404	343	17949	17103	2778	2372	0	0	0	0	0	0	0
C(T>C)T	low	1210	497	11142	10709	614	268	0	0	0	0	0	0	0
C(T>G)A	low	279	99	1279	1250	87	72	0	0	0	0	0	0	0
C(T>G)C	low	325	154	3774	3617	499	418	0	0	0	0	0	0	0
C(T>G)G	low	710	237	7931	7665	2744	2546	0	0	0	0	0	0	0
C(T>G)T	low	674	247	9403	9305	760	486	0	0	0	0	0	0	0
G(A>C)A	low	327	198	3235	3045	206	125	0	0	0	0	0	0	0
G(A>C)C	low	272	89	2481	2232	76	53	0	0	0	0	0	0	0
G(A>C)G	low	302	127	3607	3463	313	219	0	0	0	0	0	0	0
G(A>C)T	low	231	119	2180	2076	155	93	0	0	0	0	0	0	0
G(A>G)A	low	1220	436	7751	7378	391	123	0	0	0	0	0	0	0
G(A>G)C	low	892	247	9111	8720	478	218	0	0	0	0	0	0	0
G(A>G)G	low	2834	2006	10041	9494	587	306	0	0	0	0	0	0	0
G(A>G)T	low	1626	717	7034	6732	429	239	0	0	0	0	0	0	0
G(A>T)A	low	556	392	3439	3386	126	48	0	0	0	0	0	0	0
G(A>T)C	low	424	179	4081	3976	1273	1171	0	0	0	0	0	0	0
G(A>T)G	low	727	392	5145	5061	153	92	0	0	0	0	0	0	0
G(A>T)T	low	589	279	4275	4199	256	139	0	0	0	0	0	0	0
G(C>A)A	C>A	2608	2882	11418	11167	631	540	0	0	0	0	0	0	0
G(C>A)C	C>A	905	659	11574	11387	1027	935	0	0	0	0	0	0	0
G(C>A)G	C>A	242	162	6628	6423	303	179	0	0	0	0	0	0	0
G(C>A)T	C>A	1616	1747	11187	10970	178	65	0	0	0	0	0	0	0
G(C>G)A	low	828	322	2991	2833	235	154	0	0	0	0	0	0	0
G(C>G)C	low	414	238	4534	4286	288	186	0	0	0	0	0	0	0
G(C>G)G	low	239	97	2891	2534	313	202	0	0	0	0	0	0	0
G(C>G)T	low	682	300	4065	3825	203	82	0	0	0	0	0	0	0
G(C>T)A	high	1375	794	18871	18490	863	646	1	1375	794	18871	18490	863	646
G(C>T)C	high	1338	553	40121	39607	6288	5738	1	1338	553	40121	39607	6288	5738
G(C>T)G	high	4066	587	79606	78140	5665	3004	1	4066	587	79606	78140	5665	3004
G(C>T)T	high	1700	626	23310	22692	1089	669	1	1700	626	23310	22692	1089	669
G(G>A)A	low	3151	832	90875	90380	5726	966	0	0	0	0	0	0	0
G(G>A)C	high	1351	544	34993	34426	798	206	1	1351	544	34993	34426	798	206
G(G>A)G	low	1776	647	47053	46421	1861	568	0	0	0	0	0	0	0
G(G>A)T	low	1135	472	20523	20149	1307	943	0	0	0	0	0	0	0
G(G>C)A	low	747	426	8894	8599	304	171	0	0	0	0	0	0	0
G(G>C)C	low	465	249	4556	4318	327	228	0	0	0	0	0	0	0
G(G>C)G	low	376	345	3833	3691	304	216	0	0	0	0	0	0	0
G(G>C)T	low	430	369	3914	3755	307	157	0	0	0	0	0	0	0
G(G>T)A	G>T	1266	1407	14564	14286	630	465	0	0	0	0	0	0	0
G(G>T)C	G>T	875	733	14537	14361	254	134	0	0	0	0	0	0	0
G(G>T)G	G>T	1008	941	13847	13593	658	500	0	0	0	0	0	0	0
G(G>T)T	G>T	1065	873	11926	11739	687	541	0	0	0	0	0	0	0
G(T>A)A	low	450	188	2570	2463	191	171	0	0	0	0	0	0	0
G(T>A)C	low	398	180	3074	3020	154	102	0	0	0	0	0	0	0
G(T>A)G	low	453	235	3807	3631	171	84	0	0	0	0	0	0	0
G(T>A)T	low	578	281	2747	2678	273	219	0	0	0	0	0	0	0
G(T>C)A	low	945	323	10511	10293	643	443	0	0	0	0	0	0	0
G(T>C)C	low	922	242	9117	8763	287	96	0	0	0	0	0	0	0
G(T>C)G	low	696	235	10439	9758	352	136	0	0	0	0	0	0	0
G(T>C)T	low	1045	340	11399	10951	434	147	0	0	0	0	0	0	0
G(T>G)A	low	317	123	1811	1539	142	39	0	0	0	0	0	0	0
G(T>G)C	low	275	95	2520	2255	138	22	0	0	0	0	0	0	0
G(T>G)G	low	642	206	8079	6575	376	145	0	0	0	0	0	0	0
G(T>G)T	low	411	189	3909	3548	157	76	0	0	0	0	0	0	0
T(A>C)A	low	453	211	1761	1706	54	10	0	0	0	0	0	0	0
T(A>C)C	low	365	102	1914	1767	111	55	0	0	0	0	0	0	0
T(A>C)G	low	306	102	1201	1161	82	32	0	0	0	0	0	0	0
T(A>C)T	low	437	160	1422	1369	96	49	0	0	0	0	0	0	0
T(A>G)A	low	1059	420	5105	4951	174	42	0	0	0	0	0	0	0
T(A>G)C	low	942	308	11564	11064	1445	1292	0	0	0	0	0	0	0
T(A>G)G	low	1084	445	5577	5294	300	140	0	0	0	0	0	0	0
T(A>G)T	low	1576	543	10001	9578	731	530	0	0	0	0	0	0	0
T(A>T)A	low	969	508	2614	2564	153	38	0	0	0	0	0	0	0
T(A>T)C	low	419	201	2648	2556	149	54	0	0	0	0	0	0	0
T(A>T)G	low	529	277	2630	2614	182	149	0	0	0	0	0	0	0
T(A>T)T	low	713	396	3114	3047	128	88	0	0	0	0	0	0	0
T(C>A)A	C>A	1759	2113	12876	12819	326	155	0	0	0	0	0	0	0
T(C>A)C	C>A	1169	1389	13851	13707	804	684	0	0	0	0	0	0	0
T(C>A)G	C>A	239	236	5913	5857	291	215	0	0	0	0	0	0	0
T(C>A)T	C>A	2540	3314	24945	24765	877	720	0	0	0	0	0	0	0
T(C>G)A	low	1828	436	15004	14759	289	80	0	0	0	0	0	0	0
T(C>G)C	low	819	434	10199	9992	1578	1440	0	0	0	0	0	0	0
T(C>G)G	low	198	91	3629	3480	242	73	0	0	0	0	0	0	0
T(C>G)T	low	2138	672	20341	20113	1014	844	0	0	0	0	0	0	0
T(C>T)A	low	3375	899	55690	55341	2439	612	0	0	0	0	0	0	0
T(C>T)C	low	3057	821	94580	94156	6839	1570	0	0	0	0	0	0	0
T(C>T)G	high	3271	417	86483	85249	9439	1959	1	3271	417	86483	85249	9439	1959
T(C>T)T	low	3016	905	46819	46426	2570	1576	0	0	0	0	0	0	0
T(G>A)A	low	3393	863	56416	56106	4751	3128	0	0	0	0	0	0	0
T(G>A)C	high	1454	796	19277	18847	775	448	1	1454	796	19277	18847	775	448
T(G>A)G	low	1553	757	33869	33360	1448	706	0	0	0	0	0	0	0
T(G>A)T	low	2099	1032	12443	12024	391	157	0	0	0	0	0	0	0
T(G>C)A	low	1824	469	15255	15109	540	351	0	0	0	0	0	0	0
T(G>C)C	low	776	345	3072	2856	200	94	0	0	0	0	0	0	0
T(G>C)G	low	528	316	4029	3833	356	252	0	0	0	0	0	0	0
T(G>C)T	low	961	599	3831	3671	184	68	0	0	0	0	0	0	0
T(G>T)A	G>T	1652	2182	14852	14721	552	429	0	0	0	0	0	0	0
T(G>T)C	G>T	2540	2682	15583	15414	239	62	0	0	0	0	0	0	0
T(G>T)G	G>T	1376	2468	17631	17425	650	512	0	0	0	0	0	0	0
T(G>T)T	G>T	1869	1916	57084	56617	42701	42537	0	0	0	0	0	0	0
T(T>A)A	low	1241	655	2499	2426	118	59	0	0	0	0	0	0	0
T(T>A)C	low	518	383	3558	3481	130	40	0	0	0	0	0	0	0
T(T>A)G	low	345	203	3732	3650	753	690	0	0	0	0	0	0	0
T(T>A)T	low	869	483	4247	4179	60	0	0	0	0	0	0	0	0
T(T>C)A	low	1008	392	5325	5175	266	152	0	0	0	0	0	0	0
T(T>C)C	low	1289	503	8891	8577	1351	1115	0	0	0	0	0	0	0
T(T>C)G	low	662	237	8399	8075	1839	1719	0	0	0	0	0	0	0
T(T>C)T	low	1086	391	6386	6096	314	90	0	0	0	0	0	0	0
T(T>G)A	low	460	236	1802	1739	95	32	0	0	0	0	0	0	0
T(T>G)C	low	398	201	3154	3041	219	126	0	0	0	0	0	0	0
T(T>G)G	low	561	346	3132	2989	302	235	0	0	0	0	0	0	0
T(T>G)T	low	767	384	7729	7609	170	97	0	0	0	0	0	0	0

## Sheet: S3 b
Table S3b. Analysis of sequence context of hotspot substitutions defined by Chang et al. (PMID: 29247016). In total 947 hotspot substitutions mutated in 5 or more samples (column C) are included. The gene name (column A), amino acid change (column B), genomic substitutions (column D) were extracted from the source paper. The mutational contexts were provided in columns E,F,G, in case multiple mut…
									Total	# high error	% high error
									1040	284	0.273077
Gene	AAChange	Sample Counts	Mutation	Context 1	Context 2	Context 3	# mutations	# high error rate mutations
NRAS	Q61R	204	chr1.115256529.T.C	T(T>C)G			1	0
NRAS	Q61K	142	chr1.115256530.G.T	T(G>T)T			1	0
NRAS	Q61L	46	chr1.115256529.T.A	T(T>A)G			1	0
NRAS	Q61H	27	chr1.115256528.T.A;chr1.115256528.T.G	C(T>A)T	C(T>G)T		2	0
PIK3CA	E545K	575	chr3.178936091.G.A	T(G>A)A			1	0
PIK3CA	E545G	21	chr3.178936092.A.G	G(A>G)G			1	0
PIK3CA	E545Q	20	chr3.178936091.G.C	T(G>C)A			1	0
PIK3CA	E545A	12	chr3.178936092.A.C	G(A>C)G			1	0
PIK3CA	E545D	5	chr3.178936093.G.C;chr3.178936093.G.T	A(G>C)C	A(G>T)C		2	0
IDH1	R132H	570	chr2.209113112.C.T	A(C>T)G			1	1
IDH1	R132C	139	chr2.209113113.G.A	C(G>A)A			1	1
IDH1	R132G	28	chr2.209113113.G.C	C(G>C)A			1	0
IDH1	R132S	16	chr2.209113113.G.T	C(G>T)A			1	0
IDH1	R132L	12	chr2.209113112.C.A	A(C>A)G			1	0
PIK3CA	H1047R	537	chr3.178952085.A.G	C(A>G)T			1	0
PIK3CA	H1047L	85	chr3.178952085.A.T	C(A>T)T			1	0
PIK3CA	H1047Y	18	chr3.178952084.C.T	A(C>T)A			1	0
PIK3CA	H1047Q	7	chr3.178952086.T.A;chr3.178952086.T.G	A(T>A)C	A(T>G)C		2	0
BRAF	V600E	833	chr7.140453136.A.T	C(A>T)C			1	0
BRAF	V600M	29	chr7.140453137.C.T	A(C>T)T			1	0
EGFR	L858R	144	chr7.55259515.T.G	C(T>G)G			1	0
TP53	R175H	386	chr17.7578406.C.T	G(C>T)G			1	1
TP53	R175G	14	chr17.7578407.G.C	C(G>C)C			1	0
TP53	R175L	8	chr17.7578406.C.A	G(C>A)G			1	0
TP53	R175C	8	chr17.7578407.G.A	C(G>A)C			1	1
KRAS	Q61H	108	chr12.25380275.T.A;chr12.25380275.T.G	C(T>A)T	C(T>G)T		2	0
KRAS	Q61R	37	chr12.25380276.T.C	T(T>C)G			1	0
KRAS	Q61L	21	chr12.25380276.T.A	T(T>A)G			1	0
KRAS	Q61K	20	chr12.25380277.G.T	T(G>T)A			1	0
KRAS	G13D	214	chr12.25398281.C.T	G(C>T)C			1	1
KRAS	G13C	32	chr12.25398282.C.A	C(C>A)A			1	0
KRAS	G13V	6	chr12.25398281.C.A	G(C>A)C			1	0
TP53	R248Q	292	chr17.7577538.C.T	C(C>T)G			1	1
TP53	R248W	222	chr17.7577539.G.A	C(G>A)G			1	1
TP53	R248L	21	chr17.7577538.C.A	C(C>A)G			1	0
TP53	R248P	11	chr17.7577538.C.G	C(C>G)G			1	0
TP53	R248G	8	chr17.7577539.G.C	C(G>C)G			1	0
KRAS	G12D	757	chr12.25398284.C.T	A(C>T)C			1	0
KRAS	G12V	657	chr12.25398284.C.A	A(C>A)C			1	0
KRAS	G12C	384	chr12.25398285.C.A	C(C>A)A			1	0
KRAS	G12R	166	chr12.25398285.C.G	C(C>G)A			1	0
KRAS	G12A	134	chr12.25398284.C.G	A(C>G)C			1	0
KRAS	G12S	68	chr12.25398285.C.T	C(C>T)A			1	0
TP53	R273C	283	chr17.7577121.G.A	C(G>A)C			1	1
TP53	R273H	251	chr17.7577120.C.T	A(C>T)G			1	1
TP53	R273L	56	chr17.7577120.C.A	A(C>A)G			1	0
TP53	R273S	12	chr17.7577121.G.T	C(G>T)C			1	0
TP53	R273P	5	chr17.7577120.C.G	A(C>G)G			1	0
PIK3CA	E542K	356	chr3.178936082.G.A	T(G>A)A			1	0
PIK3CA	E542A	6	chr3.178936083.A.C	G(A>C)A			1	0
PIK3CA	E542Q	5	chr3.178936082.G.C	T(G>C)A			1	0
AKT1	E17K	148	chr14.105246551.C.T	T(C>T)C			1	0
GNAS	R201H	69	chr20.57484421.G.A	C(G>A)T			1	1
GNAS	R201C	65	chr20.57484420.C.T	C(C>T)G			1	1
FGFR3	S249C	114	chr4.1803568.C.G	T(C>G)C			1	0
PIK3CA	N345K	79	chr3.178921553.T.A	A(T>A)G			1	0
PIK3CA	N345I	7	chr3.178921552.A.T	A(A>T)T			1	0
PTEN	R130Q	72	chr10.89692905.G.A	C(G>A)A			1	1
PTEN	R130G	44	chr10.89692904.C.G	A(C>G)G			1	0
PTEN	R130*	38	chr10.89692904.C.T	A(C>T)G			1	1
PTEN	R130P	6	chr10.89692905.G.C	C(G>C)A			1	0
PTEN	R130L	5	chr10.89692905.G.T	C(G>T)A			1	0
HRAS	Q61R	56	chr11.533874.T.C	C(T>C)G			1	0
HRAS	Q61K	28	chr11.533875.G.T	T(G>T)G			1	0
HRAS	Q61L	16	chr11.533874.T.A	C(T>A)G			1	0
TP53	Y220C	127	chr17.7578190.T.C	A(T>C)A			1	0
TP53	Y220S	8	chr17.7578190.T.G	A(T>G)A			1	0
TP53	Y220H	6	chr17.7578191.A.G	T(A>G)G			1	0
TP53	G245S	128	chr17.7577548.C.T	C(C>T)G			1	1
TP53	G245D	50	chr17.7577547.C.T	G(C>T)C			1	1
TP53	G245V	31	chr17.7577547.C.A	G(C>A)C			1	0
TP53	G245C	22	chr17.7577548.C.A	C(C>A)G			1	0
TP53	G245R	7	chr17.7577548.C.G	C(C>G)G			1	0
TP53	R213*	208	chr17.7578212.G.A	C(G>A)A			1	1
TP53	R213Q	25	chr17.7578211.C.T	T(C>T)G			1	1
TP53	R213L	17	chr17.7578211.C.A	T(C>A)G			1	0
FBXW7	R465C	64	chr4.153249385.G.A	C(G>A)C			1	1
FBXW7	R465H	59	chr4.153249384.C.T	A(C>T)G			1	1
PIK3CA	Q546K	35	chr3.178936094.C.A	G(C>A)A			1	0
PIK3CA	Q546R	31	chr3.178936095.A.G	C(A>G)G			1	0
PIK3CA	Q546P	19	chr3.178936095.A.C	C(A>C)G			1	0
PIK3CA	Q546H	5	chr3.178936096.G.C;chr3.178936096.G.T	A(G>C)G	A(G>T)G		2	0
ERBB2	S310F	95	chr17.37868208.C.T	T(C>T)C			1	0
ERBB2	S310Y	17	chr17.37868208.C.A	T(C>A)C			1	0
GNA11	Q209L	57	chr19.3118942.A.T	C(A>T)G			1	0
GNAQ	Q209P	42	chr9.80409488.T.G	T(T>G)G			1	0
GNAQ	Q209L	22	chr9.80409488.T.A	T(T>A)G			1	0
GTF2I	L424H	68	chr7.74146970.T.A	C(T>A)T			1	0
TP53	R282W	201	chr17.7577094.G.A	C(G>A)G			1	1
TP53	R282G	9	chr17.7577094.G.C	C(G>C)G			1	0
CTNNB1	S37F	55	chr3.41266113.C.T	T(C>T)T			1	0
CTNNB1	S37C	27	chr3.41266113.C.G	T(C>G)T			1	0
CTNNB1	S37A	9	chr3.41266112.T.G	T(T>G)C			1	0
CTNNB1	S37P	7	chr3.41266112.T.C	T(T>C)C			1	0
CTNNB1	S37Y	5	chr3.41266113.C.A	T(C>A)T			1	0
CTNNB1	D32Y	22	chr3.41266097.G.T	G(G>T)A			1	0
CTNNB1	D32N	18	chr3.41266097.G.A	G(G>A)A			1	0
CTNNB1	D32V	16	chr3.41266098.A.T	G(A>T)C			1	0
CTNNB1	D32G	16	chr3.41266098.A.G	G(A>G)C			1	0
CTNNB1	D32H	6	chr3.41266097.G.C	G(G>C)A			1	0
SMAD4	R361H	60	chr18.48591919.G.A	C(G>A)C			1	1
SMAD4	R361C	54	chr18.48591918.C.T	T(C>T)G			1	1
TP53	H179R	63	chr17.7578394.T.C	A(T>C)G			1	0
TP53	H179Y	41	chr17.7578395.G.A	T(G>A)G			1	0
TP53	H179L	14	chr17.7578394.T.A	A(T>A)G			1	0
TP53	H179Q	12	chr17.7578393.A.C;chr17.7578393.A.T	C(A>C)T	C(A>T)T		2	0
TP53	H179N	8	chr17.7578395.G.T	T(G>T)G			1	0
TP53	H179D	8	chr17.7578395.G.C	T(G>C)G			1	0
CTNNB1	S33C	32	chr3.41266101.C.G	T(C>G)T			1	0
CTNNB1	S33F	29	chr3.41266101.C.T	T(C>T)T			1	0
CTNNB1	S33P	16	chr3.41266100.T.C	C(T>C)C			1	0
CTNNB1	S33Y	11	chr3.41266101.C.A	T(C>A)T			1	0
CTNNB1	S33A	7	chr3.41266100.T.G	C(T>G)C			1	0
KRAS	A146T	65	chr12.25378562.C.T	G(C>T)T			1	1
KRAS	A146V	16	chr12.25378561.G.A	T(G>A)C			1	1
KRAS	A146P	5	chr12.25378562.C.G	G(C>G)T			1	0
CTNNB1	T41A	45	chr3.41266124.A.G	T(A>G)C			1	0
CTNNB1	T41I	19	chr3.41266125.C.T	A(C>T)C			1	0
EGFR	T790M	59	chr7.55249071.C.T	A(C>T)G			1	1
NRAS	G12D	41	chr1.115258747.C.T	A(C>T)C			1	0
NRAS	G12C	11	chr1.115258748.C.A	C(C>A)T			1	0
NRAS	G12S	8	chr1.115258748.C.T	C(C>T)T			1	0
NRAS	G12A	6	chr1.115258747.C.G	A(C>G)C			1	0
NRAS	G12V	5	chr1.115258747.C.A	A(C>A)C			1	0
SF3B1	K700E	57	chr2.198266834.T.C	T(T>C)C			1	0
TP53	H193R	54	chr17.7578271.T.C	A(T>C)G			1	0
TP53	H193Y	31	chr17.7578272.G.A	T(G>A)C			1	1
TP53	H193L	19	chr17.7578271.T.A	A(T>A)G			1	0
TP53	H193P	8	chr17.7578271.T.G	A(T>G)G			1	0
TP53	H193N	5	chr17.7578272.G.T	T(G>T)C			1	0
TP53	H193D	5	chr17.7578272.G.C	T(G>C)C			1	0
ESR1	D538G	46	chr6.152419926.A.G	G(A>G)C			1	0
FBXW7	R505C	41	chr4.153247289.G.A	C(G>A)G			1	1
FBXW7	R505G	31	chr4.153247289.G.C	C(G>C)G			1	0
IDH2	R172K	33	chr15.90631838.C.T	C(C>T)T			1	0
IDH2	R172G	9	chr15.90631839.T.C	C(T>C)G			1	0
IDH2	R172S	8	chr15.90631837.C.A;chr15.90631837.C.G	G(C>A)C	G(C>G)C		2	0
IDH2	R172W	7	chr15.90631839.T.A	C(T>A)G			1	0
U2AF1	S34F	81	chr21.44524456.G.A	A(G>A)A			1	0
EGFR	A289V	37	chr7.55221822.C.T	G(C>T)C			1	1
EGFR	A289T	14	chr7.55221821.G.A	T(G>A)C			1	1
EGFR	A289D	6	chr7.55221822.C.A	G(C>A)C			1	0
ESR1	Y537S	25	chr6.152419923.A.C	T(A>C)T			1	0
ESR1	Y537C	11	chr6.152419923.A.G	T(A>G)T			1	0
ESR1	Y537N	10	chr6.152419922.T.A	C(T>A)A			1	0
CDKN2A	R80*	97	chr9.21971120.G.A	C(G>A)G			1	1
CTNNB1	S45F	31	chr3.41266137.C.T	T(C>T)T			1	0
CTNNB1	S45P	29	chr3.41266136.T.C	T(T>C)C			1	0
CTNNB1	S45C	5	chr3.41266137.C.G	T(C>G)T			1	0
TP53	C176F	54	chr17.7578403.C.A	G(C>A)A			1	0
TP53	C176Y	30	chr17.7578403.C.T	G(C>T)A			1	1
TP53	C176S	9	chr17.7578403.C.G;chr17.7578404.A.T	G(C>G)A	C(A>T)G		2	0
TP53	C176W	7	chr17.7578402.G.C	G(G>C)C			1	0
TP53	C176R	5	chr17.7578404.A.G	C(A>G)G			1	0
TP53	C176G	5	chr17.7578404.A.C	C(A>C)G			1	0
PIK3CA	R88Q	75	chr3.178916876.G.A	C(G>A)A			1	1
ERBB3	V104M	40	chr12.56478854.G.A	C(G>A)T			1	1
ERBB3	V104L	21	chr12.56478854.G.C;chr12.56478854.G.T	C(G>C)T	C(G>T)T		2	0
PIK3CA	M1043V	25	chr3.178952072.A.G	A(A>G)T			1	0
PIK3CA	M1043I	25	chr3.178952074.G.A;chr3.178952074.G.C;chr3.178952074.G.T	T(G>A)A	T(G>C)A	T(G>T)A	3	0
TP53	Y163C	54	chr17.7578442.T.C	G(T>C)A			1	0
TP53	Y163H	11	chr17.7578443.A.G	T(A>G)G			1	0
TP53	Y163N	9	chr17.7578443.A.T	T(A>T)G			1	0
ERBB2	L755S	31	chr17.37880220.T.C	T(T>C)G			1	0
TP53	R342*	129	chr17.7574003.G.A	C(G>A)G			1	1
TP53	R342P	8	chr17.7574002.C.G	T(C>G)G			1	0
TP53	R196*	131	chr17.7578263.G.A	C(G>A)G			1	1
TP53	R196P	8	chr17.7578262.C.G	T(C>G)G			1	0
H3F3A	K28M	32	chr1.226252135.A.T	A(A>T)G			1	0
FGFR3	Y373C	32	chr4.1806099.A.G	T(A>G)T			1	0
BRAF	G469A	34	chr7.140481402.C.G	T(C>G)C			1	0
BRAF	G469V	11	chr7.140481402.C.A	T(C>A)C			1	0
BRAF	G469R	8	chr7.140481403.C.T	C(C>T)A			1	0
PIK3CA	C420R	46	chr3.178927980.T.C	C(T>C)G			1	0
HRAS	G13R	22	chr11.534286.C.G	C(C>G)G			1	0
HRAS	G13V	15	chr11.534285.C.A	A(C>A)C			1	0
HRAS	G13D	6	chr11.534285.C.T	A(C>T)C			1	0
CTNNB1	G34R	28	chr3.41266103.G.A;chr3.41266103.G.C	T(G>A)G	T(G>C)G		2	0
CTNNB1	G34V	14	chr3.41266104.G.T	G(G>T)A			1	0
CTNNB1	G34E	8	chr3.41266104.G.A	G(G>A)A			1	0
TP53	I195T	42	chr17.7578265.A.G	G(A>G)T			1	0
TP53	I195F	19	chr17.7578266.T.A	A(T>A)A			1	0
TP53	I195N	10	chr17.7578265.A.T	G(A>T)T			1	0
CDKN2A	H83Y	48	chr9.21971111.G.A	T(G>A)C			1	1
CDKN2A	H83D	6	chr9.21971111.G.C	T(G>C)C			1	0
TP53	G266R	40	chr17.7577142.C.G;chr17.7577142.C.T	C(C>G)C	C(C>T)C		2	0
TP53	G266E	35	chr17.7577141.C.T	T(C>T)C			1	0
TP53	G266V	26	chr17.7577141.C.A	T(C>A)C			1	0
TP53	G266*	14	chr17.7577142.C.A	C(C>A)C			1	0
TP53	R249S	45	chr17.7577534.C.A;chr17.7577534.C.G	G(C>A)C	G(C>G)C		2	0
TP53	R249M	17	chr17.7577535.C.A	C(C>A)T			1	0
TP53	R249G	15	chr17.7577536.T.C	C(T>C)C			1	0
TP53	R249W	11	chr17.7577536.T.A	C(T>A)C			1	0
TP53	R249T	11	chr17.7577535.C.G	C(C>G)T			1	0
SF3B1	R625H	29	chr2.198267483.C.T	A(C>T)G			1	1
SF3B1	R625C	25	chr2.198267484.G.A	C(G>A)G			1	1
BRAF	K601E	32	chr7.140453134.T.C	T(T>C)C			1	0
BRAF	K601N	5	chr7.140453132.T.A	A(T>A)T			1	0
BRAF	D594N	24	chr7.140453155.C.T	T(C>T)A			1	0
BRAF	D594G	21	chr7.140453154.T.C	A(T>C)C			1	0
EZH2	Y646N	13	chr7.148508728.A.T	T(A>T)T			1	0
EZH2	Y646F	13	chr7.148508727.T.A	G(T>A)A			1	0
EZH2	Y646H	6	chr7.148508728.A.G	T(A>G)T			1	0
TP53	Y234C	42	chr17.7577580.T.C	G(T>C)A			1	0
TP53	Y234H	9	chr17.7577581.A.G	T(A>G)G			1	0
TP53	Y234N	6	chr17.7577581.A.T	T(A>T)G			1	0
TP53	Y234*	6	chr17.7577579.G.C;chr17.7577579.G.T	T(G>C)T	T(G>T)T		2	0
DNMT3A	R882H	28	chr2.25457242.C.T	G(C>T)G			1	1
DNMT3A	R882C	10	chr2.25457243.G.A	C(G>A)G			1	1
BCOR	N1459S	36	chrX.39921444.T.C	A(T>C)T			1	0
PPP2R1A	P179R	29	chr19.52715971.C.G	C(C>G)C			1	0
RAC1	P29S	43	chr7.6426892.C.T	T(C>T)C			1	0
RAC1	P29L	7	chr7.6426893.C.T	C(C>T)T			1	0
PIK3CA	G118D	40	chr3.178917478.G.A	G(G>A)T			1	0
FBXW7	R479Q	31	chr4.153247366.C.T	T(C>T)G			1	1
FBXW7	R479G	8	chr4.153247367.G.C	C(G>C)A			1	0
FBXW7	R479*	8	chr4.153247367.G.A	C(G>A)A			1	1
FBXW7	R479P	7	chr4.153247366.C.G	T(C>G)G			1	0
TP53	V173L	42	chr17.7578413.C.A;chr17.7578413.C.G	A(C>A)A	A(C>G)A		2	0
TP53	V173M	27	chr17.7578413.C.T	A(C>T)A			1	0
TP53	C238Y	40	chr17.7577568.C.T	A(C>T)A			1	0
TP53	C238F	23	chr17.7577568.C.A	A(C>A)A			1	0
TP53	C238R	5	chr17.7577569.A.G	C(A>G)C			1	0
PPP2R1A	R183W	33	chr19.52715982.C.T	G(C>T)G			1	1
PPP2R1A	R183Q	17	chr19.52715983.G.A	C(G>A)G			1	1
MYD88	L265P	37	chr3.38182641.T.C	C(T>C)G			1	0
NRAS	G13R	18	chr1.115258745.C.G	C(C>G)A			1	0
NRAS	G13D	16	chr1.115258744.C.T	A(C>T)C			1	0
TP53	Y205C	35	chr17.7578235.T.C	A(T>C)A			1	0
TP53	Y205H	8	chr17.7578236.A.G	T(A>G)C			1	0
TP53	Y205S	6	chr17.7578235.T.G	A(T>G)A			1	0
TP53	Y205F	6	chr17.7578235.T.A	A(T>A)A			1	0
PIK3CA	E726K	53	chr3.178938934.G.A	T(G>A)A			1	0
TP53	P151S	36	chr17.7578479.G.A	G(G>A)T			1	0
TP53	P151H	13	chr17.7578478.G.T	G(G>T)G			1	0
TP53	P151A	11	chr17.7578479.G.C	G(G>C)T			1	0
TP53	P151R	9	chr17.7578478.G.C	G(G>C)G			1	0
TP53	P151T	8	chr17.7578479.G.T	G(G>T)T			1	0
CDKN2A	R58*	61	chr9.21971186.G.A	C(G>A)G			1	1
EGFR	G598V	27	chr7.55233043.G.T	G(G>T)A			1	0
EGFR	G598A	5	chr7.55233043.G.C	G(G>C)A			1	0
TP53	R158L	42	chr17.7578457.C.A	G(C>A)G			1	0
TP53	R158H	36	chr17.7578457.C.T	G(C>T)G			1	1
TP53	R158P	11	chr17.7578457.C.G	G(C>G)G			1	0
TP53	R158G	9	chr17.7578458.G.C	C(G>C)G			1	0
TP53	R158C	5	chr17.7578458.G.A	C(G>A)G			1	1
TP53	Y236C	40	chr17.7577574.T.C	G(T>C)A			1	0
TP53	Y236N	5	chr17.7577575.A.T	T(A>T)G			1	0
TP53	Y236D	5	chr17.7577575.A.C	T(A>C)G			1	0
TP53	Y236*	5	chr17.7577573.G.C;chr17.7577573.G.T	T(G>C)T	T(G>T)T		2	0
HRAS	G12S	14	chr11.534289.C.T	C(C>T)G			1	1
HRAS	G12D	14	chr11.534288.C.T	G(C>T)C			1	1
FGFR3	R248C	31	chr4.1803564.C.T	G(C>T)G			1	1
TP53	C275F	25	chr17.7577114.C.A	A(C>A)A			1	0
TP53	C275Y	24	chr17.7577114.C.T	A(C>T)A			1	0
TP53	C275R	7	chr17.7577115.A.G	C(A>G)A			1	0
TP53	C275S	6	chr17.7577114.C.G	A(C>G)A			1	0
TP53	C135Y	27	chr17.7578526.C.T	G(C>T)A			1	1
TP53	C135F	24	chr17.7578526.C.A	G(C>A)A			1	0
TP53	C135R	9	chr17.7578527.A.G	C(A>G)A			1	0
TP53	P278S	37	chr17.7577106.G.A	G(G>A)A			1	0
TP53	P278L	17	chr17.7577105.G.A	A(G>A)G			1	0
TP53	P278A	13	chr17.7577106.G.C	G(G>C)A			1	0
TP53	P278T	12	chr17.7577106.G.T	G(G>T)A			1	0
TP53	P278R	12	chr17.7577105.G.C	A(G>C)G			1	0
TP53	P278H	6	chr17.7577105.G.T	A(G>T)G			1	0
IDH2	R140Q	20	chr15.90631934.C.T	C(C>T)G			1	1
SPOP	F133L	32	chr17.47696424.G.C;chr17.47696424.G.T;chr17.47696426.A.G	T(G>C)A	T(G>T)A	A(A>G)T	3	0
SPOP	F133V	19	chr17.47696426.A.C	A(A>C)T			1	0
SPOP	F133C	8	chr17.47696425.A.C	G(A>C)A			1	0
SPOP	F133S	5	chr17.47696425.A.G	G(A>G)A			1	0
PIK3CA	K111E	22	chr3.178916944.A.G	A(A>G)A			1	0
PIK3CA	K111N	14	chr3.178916946.G.C;chr3.178916946.G.T	A(G>C)A	A(G>T)A		2	0
TP53	S241F	51	chr17.7577559.G.A	G(G>A)A			1	0
TP53	S241C	19	chr17.7577559.G.C	G(G>C)A			1	0
TP53	S241Y	15	chr17.7577559.G.T	G(G>T)A			1	0
TP53	S241P	6	chr17.7577560.A.G	G(A>G)A			1	0
EGFR	G719A	18	chr7.55241708.G.C	G(G>C)C			1	0
EGFR	G719C	7	chr7.55241707.G.T	G(G>T)G			1	0
EGFR	G719S	5	chr7.55241707.G.A	G(G>A)G			1	0
TP53	M237I	55	chr17.7577570.C.A;chr17.7577570.C.G;chr17.7577570.C.T	A(C>A)A	A(C>G)A	A(C>T)A	3	0
TP53	M237K	5	chr17.7577571.A.T	C(A>T)T			1	0
FGFR2	N549K	21	chr10.123258034.A.C;chr10.123258034.A.T	G(A>C)T	G(A>T)T		2	0
RXRA	S427F	22	chr9.137328351.C.T	T(C>T)C			1	0
NFE2L2	R34G	16	chr2.178098945.G.C	C(G>C)A			1	0
NFE2L2	R34Q	11	chr2.178098944.C.T	T(C>T)G			1	1
NFE2L2	R34P	5	chr2.178098944.C.G	T(C>G)G			1	0
TP53	V157F	67	chr17.7578461.C.A	A(C>A)G			1	0
MAP2K1	K57N	16	chr15.66727455.G.C;chr15.66727455.G.T	A(G>C)C	A(G>T)C		2	0
MAP2K1	K57T	7	chr15.66727454.A.C	A(A>C)G			1	0
MAP2K1	K57E	6	chr15.66727453.A.G	G(A>G)A			1	0
AR	L702H	18	chrX.66931463.T.A	C(T>A)C			1	0
TP53	V272M	34	chr17.7577124.C.T	A(C>T)C			1	0
TP53	V272L	20	chr17.7577124.C.A;chr17.7577124.C.G	A(C>A)C	A(C>G)C		2	0
TP53	V272G	5	chr17.7577123.A.C	C(A>C)C			1	0
FLT3	D835Y	11	chr13.28592642.C.A	T(C>A)T			1	0
ATM	R337C	31	chr11.108117798.C.T	T(C>T)G			1	1
ATM	R337H	9	chr11.108117799.G.A	C(G>A)T			1	1
TP53	K132N	30	chr17.7578534.C.A;chr17.7578534.C.G	T(C>A)T	T(C>G)T		2	0
TP53	K132R	27	chr17.7578535.T.C	C(T>C)T			1	0
TP53	K132E	14	chr17.7578536.T.C	T(T>C)G			1	0
TP53	K132M	5	chr17.7578535.T.A	C(T>A)T			1	0
CIC	R215W	17	chr19.42791757.C.T	C(C>T)G			1	1
CIC	R215Q	7	chr19.42791758.G.A	C(G>A)G			1	1
PIK3CA	E453K	31	chr3.178928079.G.A	A(G>A)A			1	0
PIK3CA	E453Q	10	chr3.178928079.G.C	A(G>C)A			1	0
CDKN2A	W110*	45	chr9.21971028.C.T;chr9.21971029.C.T	C(C>T)C	C(C>T)A		2	0
TP53	R280K	36	chr17.7577099.C.T	T(C>T)T			1	0
TP53	R280T	34	chr17.7577099.C.G	T(C>G)T			1	0
TP53	R280G	17	chr17.7577100.T.C	C(T>C)C			1	0
TP53	R280I	12	chr17.7577099.C.A	T(C>A)T			1	0
TP53	R280S	8	chr17.7577098.T.A;chr17.7577098.T.G	C(T>A)C	C(T>G)C		2	0
GTF2I	N440S	19	chr7.74148279.A.G	A(A>G)T			1	0
NFE2L2	E79Q	17	chr2.178098810.C.G	T(C>G)T			1	0
NFE2L2	E79K	11	chr2.178098810.C.T	T(C>T)T			1	0
ERBB2	R678Q	31	chr17.37879658.G.A	C(G>A)G			1	1
TP53	S215I	20	chr17.7578205.C.A	A(C>A)T			1	0
TP53	S215R	13	chr17.7578204.A.C;chr17.7578204.A.T;chr17.7578206.T.G	C(A>C)C	C(A>T)C	C(T>G)A	3	0
TP53	S215G	8	chr17.7578206.T.C	C(T>C)A			1	0
TP53	S215N	7	chr17.7578205.C.T	A(C>T)T			1	0
BRAF	N581S	13	chr7.140453193.T.C	A(T>C)C			1	0
KIT	N822K	14	chr4.55599340.T.A;chr4.55599340.T.G	A(T>A)T	A(T>G)T		2	0
KIT	N822Y	6	chr4.55599338.A.T	T(A>T)A			1	0
RHOA	G17V	16	chr3.49412973.C.A	T(C>A)C			1	0
RHOA	G17E	15	chr3.49412973.C.T	T(C>T)C			1	0
RHOA	G17A	5	chr3.49412973.C.G	T(C>G)C			1	0
CDK4	R24L	10	chr12.58145430.C.A	A(C>A)G			1	0
CDK4	R24H	7	chr12.58145430.C.T	A(C>T)G			1	1
BRAF	G466V	17	chr7.140481411.C.A	T(C>A)C			1	0
BRAF	G466E	14	chr7.140481411.C.T	T(C>T)C			1	0
AR	T878A	14	chrX.66943552.A.G	C(A>G)C			1	0
PTEN	R233*	45	chr10.89717672.C.T	A(C>T)G			1	1
TP53	N239S	19	chr17.7577565.T.C	G(T>C)T			1	0
TP53	N239D	18	chr17.7577566.T.C	T(T>C)A			1	0
AR	H875Y	16	chrX.66943543.C.T	G(C>T)A			1	1
POLE	P286R	23	chr12.133253184.G.C	A(G>C)G			1	0
CREBBP	R1446C	14	chr16.3788618.G.A	C(G>A)G			1	1
CREBBP	R1446H	10	chr16.3788617.C.T	G(C>T)G			1	1
CREBBP	R1446L	6	chr16.3788617.C.A	G(C>A)G			1	0
TP53	C242F	27	chr17.7577556.C.A	G(C>A)A			1	0
TP53	C242Y	12	chr17.7577556.C.T	G(C>T)A			1	1
TP53	C242S	9	chr17.7577556.C.G;chr17.7577557.A.T	G(C>G)A	C(A>T)G		2	0
CD79B	Y197H	5	chr17.62006799.A.G	T(A>G)G			1	0
NFE2L2	E82D	13	chr2.178098799.T.A;chr2.178098799.T.G	A(T>A)T	A(T>G)T		2	0
PIK3CA	V344G	13	chr3.178921549.T.G	G(T>G)G			1	0
PIK3CA	V344M	11	chr3.178921548.G.A	C(G>A)T			1	1
MED12	G44S	8	chrX.70339253.G.A	A(G>A)G			1	0
MED12	G44D	6	chrX.70339254.G.A	G(G>A)T			1	0
MED12	G44C	5	chrX.70339253.G.T	A(G>T)G			1	0
EGFR	L861Q	21	chr7.55259524.T.A	C(T>A)G			1	0
ERBB4	S1289A	12	chr2.212248402.A.C	G(A>C)G			1	0
TP53	G244D	21	chr17.7577550.C.T	G(C>T)C			1	1
TP53	G244C	19	chr17.7577551.C.A	C(C>A)C			1	0
TP53	G244S	15	chr17.7577551.C.T	C(C>T)C			1	0
TP53	G244V	6	chr17.7577550.C.A	G(C>A)C			1	0
PIK3CA	R93Q	18	chr3.178916891.G.A	C(G>A)G			1	1
PIK3CA	R93W	12	chr3.178916890.C.T	T(C>T)G			1	1
MED12	L1224F	16	chrX.70349258.C.T	T(C>T)T			1	0
ERCC2	N238S	16	chr19.45867687.T.C	G(T>C)T			1	0
FOXL2	C134W	12	chr3.138665163.G.C	C(G>C)C			1	0
STK19	D89N	16	chr6.31940123.G.A	A(G>A)A			1	0
TP53	V274F	14	chr17.7577118.C.A	A(C>A)A			1	0
TP53	V274A	12	chr17.7577117.A.G	A(A>G)C			1	0
TP53	V274G	8	chr17.7577117.A.C	A(A>C)C			1	0
TP53	V274D	7	chr17.7577117.A.T	A(A>T)C			1	0
TP53	V274L	5	chr17.7577118.C.G	A(C>G)A			1	0
PIK3CA	R108H	25	chr3.178916936.G.A	C(G>A)T			1	1
MAPK1	E322K	24	chr22.22127164.C.T	T(C>T)G			1	1
XPO1	E571K	25	chr2.61719472.C.T	T(C>T)G			1	1
RHOA	Y42C	14	chr3.49412898.T.C	A(T>C)A			1	0
NFE2L2	D29H	19	chr2.178098960.C.G	T(C>G)T			1	0
NFE2L2	D29Y	7	chr2.178098960.C.A	T(C>A)T			1	0
ERBB2	V777L	17	chr17.37881000.G.C;chr17.37881000.G.T	T(G>C)T	T(G>T)T		2	0
KIT	D816V	11	chr4.55599321.A.T	G(A>T)C			1	0
KIT	D816Y	5	chr4.55599320.G.T	A(G>T)A			1	0
KIT	D816H	5	chr4.55599320.G.C	A(G>C)A			1	0
ALK	R1275Q	16	chr2.29432664.C.T	T(C>T)G			1	1
CTNNB1	K335I	16	chr3.41268766.A.T	A(A>T)A			1	0
ALK	F1174L	11	chr2.29443695.G.C;chr2.29443695.G.T;chr2.29443697.A.G	T(G>C)A	T(G>T)A	A(A>G)T	3	0
ERBB2	V842I	26	chr17.37881332.G.A	C(G>A)T			1	1
MAP2K1	P124S	15	chr15.66729162.C.T	T(C>T)C			1	0
MAP2K1	P124L	6	chr15.66729163.C.T	C(C>T)G			1	1
SMAD4	D537G	10	chr18.48604788.A.G	G(A>G)C			1	0
SMAD4	D537H	6	chr18.48604787.G.C	A(G>C)A			1	0
SMAD4	D537V	5	chr18.48604788.A.T	G(A>T)C			1	0
TP53	E285K	68	chr17.7577085.C.T	T(C>T)T			1	0
TP53	E285*	15	chr17.7577085.C.A	T(C>A)T			1	0
TP53	E285V	9	chr17.7577084.T.A	C(T>A)C			1	0
TP53	R306*	85	chr17.7577022.G.A	C(G>A)C			1	1
TP53	H214R	35	chr17.7578208.T.C	A(T>C)G			1	0
SMARCA4	T910M	26	chr19.11132513.C.T	A(C>T)G			1	1
PIK3CA	G106V	14	chr3.178916930.G.T	G(G>T)C			1	0
PIK3CA	G106R	6	chr3.178916929.G.C	A(G>C)G			1	0
HIST1H3B	K28M	11	chr6.26032206.T.A	C(T>A)T			1	0
POLE	V411L	18	chr12.133250289.C.A;chr12.133250289.C.G	A(C>A)C	A(C>G)C		2	0
CDH1	Q23*	19	chr16.68772218.C.T	C(C>T)A			1	0
FGFR1	N577K	17	chr8.38274849.G.C;chr8.38274849.G.T	G(G>C)T	G(G>T)T		2	0
TP53	E286K	41	chr17.7577082.C.T	T(C>T)C			1	0
TP53	E286*	14	chr17.7577082.C.A	T(C>A)C			1	0
TP53	E286Q	7	chr17.7577082.C.G	T(C>G)C			1	0
TP53	E286G	6	chr17.7577081.T.C	T(T>C)C			1	0
RAF1	S257L	24	chr3.12645699.G.A	C(G>A)A			1	1
FGFR2	S252W	18	chr10.123279677.G.C	C(G>C)A			1	0
KRAS	K117N	17	chr12.25378647.T.A;chr12.25378647.T.G	A(T>A)T	A(T>G)T		2	0
EGFR	R108K	17	chr7.55211080.G.A	A(G>A)A			1	0
PIK3R1	N564D	17	chr5.67591097.A.G	G(A>G)A			1	0
NFE2L2	G31A	9	chr2.178098953.C.G	T(C>G)C			1	0
NFE2L2	G31E	7	chr2.178098953.C.T	T(C>T)C			1	0
NFE2L2	G81S	6	chr2.178098804.C.T	C(C>T)T			1	0
TCEB1	Y79C	6	chr8.74858968.T.C	G(T>C)A			1	0
MAP2K1	F53L	12	chr15.66727441.T.C;chr15.66727443.T.A;chr15.66727443.T.G	C(T>C)T	T(T>A)C	T(T>G)C	3	0
ERBB3	E928G	15	chr12.56492633.A.G	G(A>G)G			1	0
ERBB3	D297Y	18	chr12.56482341.G.T	G(G>T)A			1	0
TP53	C141Y	25	chr17.7578508.C.T	G(C>T)A			1	1
TP53	C141W	9	chr17.7578507.G.C	G(G>C)C			1	0
TP53	C141R	5	chr17.7578509.A.G	C(A>G)G			1	0
TP53	D281N	14	chr17.7577097.C.T	T(C>T)T			1	0
TP53	D281E	14	chr17.7577095.G.C;chr17.7577095.G.T	G(G>C)T	G(G>T)T		2	0
TP53	D281Y	13	chr17.7577097.C.A	T(C>A)T			1	0
TP53	D281V	9	chr17.7577096.T.A	G(T>A)C			1	0
TP53	D281H	9	chr17.7577097.C.G	T(C>G)T			1	0
EP300	D1399N	20	chr22.41565529.G.A	C(G>A)A			1	1
TP53	V216M	24	chr17.7578203.C.T	A(C>T)A			1	0
TP53	V216L	9	chr17.7578203.C.A;chr17.7578203.C.G	A(C>A)A	A(C>G)A		2	0
TP53	V216G	5	chr17.7578202.A.C	C(A>C)C			1	0
NUP93	Q15*	15	chr16.56782202.C.T	A(C>T)A			1	0
SMAD4	G386D	9	chr18.48593406.G.A	G(G>A)T			1	0
SMAD4	G386V	6	chr18.48593406.G.T	G(G>T)T			1	0
TP53	R337C	36	chr17.7574018.G.A	C(G>A)C			1	1
TP53	R337L	20	chr17.7574017.C.A	G(C>A)G			1	0
EGFR	S768I	14	chr7.55249005.G.T	A(G>T)C			1	0
PTPN11	A72V	6	chr12.112888199.C.T	G(C>T)C			1	1
PTPN11	A72T	6	chr12.112888198.G.A	T(G>A)C			1	1
MYCN	P44L	19	chr2.16082317.C.T	C(C>T)C			1	0
PDGFRA	D842V	9	chr4.55152093.A.T	G(A>T)C			1	0
TP53	Y126C	11	chr17.7578553.T.C	G(T>C)A			1	0
TP53	Y126D	8	chr17.7578554.A.C	T(A>C)C			1	0
TP53	Y126*	7	chr17.7578552.G.C;chr17.7578552.G.T	A(G>C)T	A(G>T)T		2	0
NFE2L2	T80R	5	chr2.178098806.G.C	T(G>C)T			1	0
PIK3CA	G1049R	16	chr3.178952090.G.C	T(G>C)G			1	0
ESR1	L536H	6	chr6.152419920.T.A	C(T>A)C			1	0
SF3B1	E902K	13	chr2.198265453.C.T	T(C>T)T			1	0
TP53	A159V	27	chr17.7578454.G.A	G(G>A)C			1	1
TP53	A159P	23	chr17.7578455.C.G	G(C>G)G			1	0
TP53	I255F	12	chr17.7577518.T.A	A(T>A)G			1	0
TP53	I255N	7	chr17.7577517.A.T	G(A>T)T			1	0
TP53	I255T	6	chr17.7577517.A.G	G(A>G)T			1	0
TP53	I255S	6	chr17.7577517.A.C	G(A>C)T			1	0
PPP6C	R264C	19	chr9.127912080.G.A	C(G>A)A			1	1
PIK3CA	Y1021C	11	chr3.178952007.A.G	T(A>G)C			1	0
KIT	K642E	12	chr4.55594221.A.G	C(A>G)A			1	0
TP53	L194R	30	chr17.7578268.A.C	A(A>C)G			1	0
TP53	L194F	12	chr17.7578269.G.A	A(G>A)A			1	0
PIK3R1	G376R	18	chr5.67589138.G.A;chr5.67589138.G.C	G(G>A)G	G(G>C)G		2	0
PIK3CA	R38H	11	chr3.178916726.G.A	C(G>A)T			1	1
PIK3CA	R38C	8	chr3.178916725.C.T	C(C>T)G			1	1
MET	D1010N	6	chr7.116412043.G.A	A(G>A)G			1	0
MET	D1010H	6	chr7.116412043.G.C	A(G>C)G			1	0
ARID1A	R1989*	28	chr1.27106354.C.T	T(C>T)G			1	1
SPOP	F102C	12	chr17.47696643.A.C	G(A>C)A			1	0
SPOP	F102V	7	chr17.47696644.A.C	A(A>C)T			1	0
PIK3CA	N1044K	12	chr3.178952077.T.A;chr3.178952077.T.G	A(T>A)G	A(T>G)G		2	0
MAX	R60Q	21	chr14.65544747.C.T	C(C>T)G			1	1
PPP2R1A	S256F	11	chr19.52716323.C.T	T(C>T)C			1	0
PIK3CA	E81K	24	chr3.178916854.G.A	A(G>A)A			1	0
FGFR2	C382R	14	chr10.123274774.A.G	C(A>G)G			1	0
CDKN2A	P114L	24	chr9.21971017.G.A	G(G>A)G			1	0
ESR1	E380Q	14	chr6.152332832.G.C	A(G>C)A			1	0
SMAD4	D351Y	6	chr18.48591888.G.T	T(G>T)A			1	0
SMAD4	D351N	5	chr18.48591888.G.A	T(G>A)A			1	0
ERBB3	K329E	9	chr12.56482437.A.G	C(A>G)A			1	0
PIK3R1	K567E	12	chr5.67591106.A.G	T(A>G)A			1	0
CDKN2A	D108Y	14	chr9.21971036.C.A	T(C>A)G			1	0
CDKN2A	D108N	9	chr9.21971036.C.T	T(C>T)G			1	1
KIT	V559A	6	chr4.55593610.T.C	G(T>C)T			1	0
KIT	V559D	5	chr4.55593610.T.A	G(T>A)T			1	0
CDKN2A	D84N	12	chr9.21971108.C.T	T(C>T)G			1	1
CDKN2A	D84Y	6	chr9.21971108.C.A	T(C>A)G			1	0
MTOR	S2215Y	12	chr1.11184573.G.T	A(G>T)A			1	0
MTOR	S2215F	9	chr1.11184573.G.A	A(G>A)A			1	0
TGFBR2	R553H	10	chr3.30732970.G.A	C(G>A)T			1	1
TGFBR2	R553C	9	chr3.30732969.C.T	C(C>T)G			1	1
SMAD2	S464*	21	chr18.45368211.G.C;chr18.45368211.G.T	T(G>C)A	T(G>T)A		2	0
RHEB	Y35N	5	chr7.151188050.A.T	T(A>T)G			1	0
KIT	L576P	14	chr4.55593661.T.C	C(T>C)T			1	0
KIT	V654A	8	chr4.55594258.T.C	G(T>C)G			1	0
MTOR	T1977K	7	chr1.11188164.G.T	T(G>T)T			1	0
TP53	F270V	8	chr17.7577130.A.C	A(A>C)G			1	0
TP53	F270L	8	chr17.7577128.A.C;chr17.7577130.A.G	C(A>C)A	A(A>G)G		2	0
TP53	F270S	6	chr17.7577129.A.G	A(A>G)A			1	0
H3F3A	G35R	9	chr1.226252155.G.A;chr1.226252155.G.C	A(G>A)G	A(G>C)G		2	0
RRAS2	Q72L	7	chr11.14316390.T.A	T(T>A)G			1	0
PTEN	R173H	17	chr10.89711900.G.A	C(G>A)C			1	1
PTEN	R173C	14	chr10.89711899.C.T	G(C>T)G			1	1
TP53	E258K	14	chr17.7577509.C.T	T(C>T)C			1	0
TP53	E258*	14	chr17.7577509.C.A	T(C>A)C			1	0
TP53	E258D	5	chr17.7577507.T.A	C(T>A)T			1	0
PIK3CA	C901F	13	chr3.178947827.G.T	T(G>T)T			1	0
GATA3	M293K	8	chr10.8106058.T.A	A(T>A)G			1	0
CTNNB1	N387K	9	chr3.41274911.T.A;chr3.41274911.T.G	A(T>A)C	A(T>G)C		2	0
ERBB4	Q707E	6	chr2.212488730.G.C	T(G>C)A			1	0
RET	M918T	11	chr10.43617416.T.C	A(T>C)G			1	0
CIC	R202W	11	chr19.42791718.C.T	G(C>T)G			1	1
CDKN2A	Q50*	16	chr9.21974679.G.A	T(G>A)G			1	0
FOXA1	F266L	5	chr14.38061191.G.C;chr14.38061191.G.T;chr14.38061193.A.G	T(G>C)A	T(G>T)A	A(A>G)G	3	0
ERBB3	A232V	14	chr12.56481660.C.T	G(C>T)C			1	1
SPOP	W131G	12	chr17.47696432.A.C	C(A>C)G			1	0
SPOP	Y87N	8	chr17.47696689.A.T	T(A>T)A			1	0
MTOR	I2500F	5	chr1.11169377.T.A	A(T>A)C			1	0
SMARCB1	R377H	11	chr22.24176339.G.A	C(G>A)T			1	1
SMARCB1	R377C	5	chr22.24176338.C.T	G(C>T)G			1	1
PIK3CB	D1067V	8	chr3.138374244.T.A	G(T>A)C			1	0
FGFR3	G370C	8	chr4.1806089.G.T	G(G>T)G			1	0
SF3B1	K666T	5	chr2.198267360.T.G	C(T>G)T			1	0
VHL	S65*	7	chr3.10183725.C.A	T(C>A)G			1	0
VHL	S65L	6	chr3.10183725.C.T	T(C>T)G			1	1
CDK4	K22M	5	chr12.58145436.T.A	C(T>A)T			1	0
TP53	F134L	12	chr17.7578528.A.C;chr17.7578528.A.T;chr17.7578530.A.G	A(A>C)A	A(A>T)A	A(A>G)C	3	0
TP53	F134V	5	chr17.7578530.A.C	A(A>C)C			1	0
KIT	W557R	6	chr4.55593603.T.A;chr4.55593603.T.C	G(T>A)G	G(T>C)G		2	0
EGFR	R222C	15	chr7.55220274.C.T	G(C>T)G			1	1
EGFR	R252C	9	chr7.55221710.C.T	C(C>T)G			1	1
FGFR3	K650E	7	chr4.1807889.A.G	G(A>G)A			1	0
SMARCA4	G1232S	11	chr19.11144113.G.A	C(G>A)G			1	1
ARID2	S297F	16	chr12.46230641.C.T	T(C>T)C			1	0
ERBB3	G284R	13	chr12.56481922.G.A	A(G>A)G			1	0
ERBB2	D769Y	12	chr17.37880261.G.T	A(G>T)A			1	0
ERBB2	D769H	6	chr17.37880261.G.C	A(G>C)A			1	0
STK11	E223*	13	chr19.1220649.G.T	C(G>T)A			1	0
FGFR1	K687E	8	chr8.38272308.T.C	T(T>C)T			1	0
SOX17	S403I	8	chr8.55372518.G.T	A(G>T)C			1	0
NUP93	E14K	16	chr16.56782199.G.A	T(G>A)A			1	0
TP53	M246V	16	chr17.7577545.T.C	A(T>C)G			1	0
TP53	M246I	10	chr17.7577543.C.A;chr17.7577543.C.G;chr17.7577543.C.T	T(C>A)A	T(C>G)A	T(C>T)A	3	0
TP53	R110L	25	chr17.7579358.C.A	A(C>A)G			1	0
TP53	R110P	11	chr17.7579358.C.G	A(C>G)G			1	0
TP53	R110C	6	chr17.7579359.G.A	C(G>A)G			1	1
APC	Q1429*	22	chr5.112175576.C.T	A(C>T)A			1	0
PTEN	C136R	9	chr10.89692922.T.C	A(T>C)G			1	0
PTEN	G132D	8	chr10.89692911.G.A	G(G>A)T			1	0
SMARCA4	R1192C	9	chr19.11143993.C.T	C(C>T)G			1	1
SMARCA4	R1192H	7	chr19.11143994.G.A	C(G>A)C			1	1
INPPL1	A1185D	11	chr11.71949087.C.A	G(C>A)T			1	0
SMAD4	P356L	10	chr18.48591904.C.T	C(C>T)T			1	0
ERBB3	S846I	10	chr12.56491645.G.T	A(G>T)T			1	0
STK11	D194Y	7	chr19.1220487.G.T	C(G>T)A			1	0
FBXW7	R658*	15	chr4.153244185.G.A	C(G>A)A			1	1
AR	W742C	6	chrX.66937372.G.C;chrX.66937372.G.T	G(G>C)A	G(G>T)A		2	0
TP53	V143M	12	chr17.7578503.C.T	A(C>T)A			1	0
TP53	V143A	7	chr17.7578502.A.G	C(A>G)C			1	0
TP53	V143G	5	chr17.7578502.A.C	C(A>C)C			1	0
CCND1	P287S	5	chr11.69466021.C.T	A(C>T)C			1	0
CIC	R1512H	5	chr19.42799051.G.A	C(G>A)T			1	1
FBXW7	R689W	14	chr4.153244092.G.A	C(G>A)A			1	1
FBXW7	R689Q	5	chr4.153244091.C.T	C(C>T)G			1	1
MAP2K1	E203K	14	chr15.66774131.G.A	G(G>A)A			1	0
FOXA1	I176V	7	chr14.38061463.T.C	A(T>C)G			1	0
DICER1	E1813G	6	chr14.95557629.T.C	C(T>C)C			1	0
PTPN11	E76K	7	chr12.112888210.G.A	T(G>A)A			1	0
KNSTRN	S24F	13	chr15.40675107.C.T	T(C>T)C			1	0
NF1	R440*	17	chr17.29533315.C.T	T(C>T)G			1	1
ACVR1	G328E	5	chr2.158622516.C.T	C(C>T)C			1	0
CCND1	T286I	8	chr11.69466019.C.T	A(C>T)A			1	0
VHL	L89H	9	chr3.10183797.T.A	C(T>A)C			1	0
VHL	L89P	5	chr3.10183797.T.C	C(T>C)C			1	0
NOTCH2	T235S	10	chr1.120539668.T.A	G(T>A)G			1	0
CIC	R1515H	5	chr19.42799060.G.A	C(G>A)C			1	1
CIC	R1515C	5	chr19.42799059.C.T	G(C>T)G			1	1
NFE2L2	L30F	7	chr2.178098957.G.A	A(G>A)A			1	0
TP53	S127F	31	chr17.7578550.G.A	G(G>A)A			1	0
TP53	S127Y	10	chr17.7578550.G.T	G(G>T)A			1	0
EGFR	E709K	13	chr7.55241677.G.A	G(G>A)A			1	0
TP53	Q136*	16	chr17.7578524.G.A	T(G>A)G			1	0
TP53	Q136E	10	chr17.7578524.G.C	T(G>C)G			1	0
ERBB3	H228Q	6	chr12.56481649.T.A;chr12.56481649.T.G	A(T>A)G	A(T>G)G		2	0
TP53	C277F	20	chr17.7577108.C.A	A(C>A)A			1	0
APC	Q1367*	28	chr5.112175390.C.T	T(C>T)A			1	0
MYOD1	L122R	5	chr11.17741694.T.G	C(T>G)G			1	0
TP53	W91*	35	chr17.7579414.C.T;chr17.7579415.C.T	G(C>T)C	C(C>T)A		2	1
ARID1A	R693*	16	chr1.27087503.C.T	C(C>T)G			1	1
CTNNB1	H36P	7	chr3.41266110.A.C	C(A>C)T			1	0
NFE2L2	W24R	7	chr2.178098975.A.G;chr2.178098975.A.T	C(A>G)A	C(A>T)A		2	0
HRAS	K117N	8	chr11.533552.C.A;chr11.533552.C.G	A(C>A)T	A(C>G)T		2	0
KDM6A	Q555*	16	chrX.44922802.C.T	T(C>T)A			1	0
TP53	E298*	36	chr17.7577046.C.A	T(C>A)G			1	0
ARID1A	R2158*	12	chr1.27106861.C.T	C(C>T)G			1	1
ATM	R3008H	7	chr11.108236087.G.A	C(G>A)T			1	1
ATM	R3008C	6	chr11.108236086.C.T	A(C>T)G			1	1
EGFR	L62R	10	chr7.55210075.T.G	C(T>G)T			1	0
PTEN	D92E	7	chr10.89692792.C.A;chr10.89692792.C.G	A(C>A)C	A(C>G)C		2	0
FGFR4	V550L	7	chr5.176522551.G.C;chr5.176522551.G.T	C(G>C)T	C(G>T)T		2	0
KRAS	A59T	5	chr12.25380283.C.T	G(C>T)T			1	1
DIS3	D488N	7	chr13.73346338.C.T	T(C>T)G			1	1
CDH1	D254N	5	chr16.68844172.G.A	C(G>A)A			1	1
CDKN2A	E88*	18	chr9.21971096.C.A	T(C>A)C			1	0
CDKN2A	E88K	8	chr9.21971096.C.T	T(C>T)C			1	0
MYD88	S243N	7	chr3.38182292.G.A	A(G>A)C			1	1
PIK3CA	G1007R	9	chr3.178951964.G.C	T(G>C)G			1	0
PTEN	Y68H	6	chr10.89685307.T.C	A(T>C)A			1	0
GNAQ	T96S	9	chr9.80537112.T.A	G(T>A)G			1	0
SETD2	R1625C	6	chr3.47144880.G.A	C(G>A)A			1	1
SETD2	R1625H	5	chr3.47144879.C.T	A(C>T)G			1	1
SDHA	L639V	7	chr5.256455.C.G	T(C>G)T			1	0
PIK3CA	T1025A	7	chr3.178952018.A.G	G(A>G)C			1	0
SOS1	N233Y	7	chr2.39281778.T.A	T(T>A)G			1	0
ARID1A	R1276*	14	chr1.27099947.C.T	A(C>T)G			1	1
EIF1AX	G9D	6	chrX.20156731.C.T	A(C>T)C			1	0
FGFR3	G380R	11	chr4.1806119.G.A	C(G>A)G			1	1
FBXW7	R367*	16	chr4.153251907.G.A	C(G>A)C			1	1
TCF7L2	R471C	8	chr10.114925333.C.T	T(C>T)G			1	1
RHOA	R5W	8	chr3.49413010.G.A	C(G>A)G			1	1
RHOA	R5Q	8	chr3.49413009.C.T	C(C>T)G			1	1
PIK3CA	D350N	6	chr3.178921566.G.A	A(G>A)A			1	0
PIK3CA	D350G	5	chr3.178921567.A.G	G(A>G)C			1	0
MAP2K1	G128D	5	chr15.66729175.G.A	G(G>A)C			1	1
PTEN	H93R	6	chr10.89692794.A.G	C(A>G)T			1	0
SF3B1	K741N	5	chr2.198266709.C.A;chr2.198266709.C.G	C(C>A)T	C(C>G)T		2	0
RAC1	A178V	12	chr7.6441974.C.T	G(C>T)G			1	1
VHL	S80R	5	chr3.10183769.A.C;chr3.10183771.T.A;chr3.10183771.T.G	C(A>C)G	G(T>A)C	G(T>G)C	3	0
NF1	R2450*	16	chr17.29677227.C.T	T(C>T)G			1	1
RB1	R251*	15	chr13.48936983.C.T	T(C>T)G			1	1
RB1	R320*	14	chr13.48941648.C.T	A(C>T)G			1	1
PIK3CB	E1051K	9	chr3.138374293.C.T	T(C>T)C			1	0
ACVR1	R258G	5	chr2.158626898.T.C	C(T>C)C			1	0
APC	Q1378*	23	chr5.112175423.C.T	T(C>T)A			1	0
TP63	R379C	14	chr3.189587118.C.T	T(C>T)G			1	1
MAX	H28R	6	chr14.65560514.T.C	A(T>C)G			1	0
ERCC2	Y24C	5	chr19.45873425.T.C	G(T>C)A			1	0
PTPN11	Q510L	5	chr12.112926909.A.T	C(A>T)G			1	0
SMAD4	R445*	16	chr18.48603032.C.T	T(C>T)G			1	1
RAF1	S259F	7	chr3.12645693.G.A	G(G>A)A			1	0
TP53	G154V	23	chr17.7578469.C.A	G(C>A)C			1	0
PIK3CA	P104L	10	chr3.178916924.C.T	C(C>T)A			1	0
CTCF	R377C	9	chr16.67654642.C.T	G(C>T)G			1	1
TP53	L130V	13	chr17.7578542.G.C	A(G>C)G			1	0
TP53	L130F	10	chr17.7578542.G.A	A(G>A)G			1	0
STAG2	R216*	11	chrX.123179197.C.T	T(C>T)G			1	1
FGFR3	S371C	5	chr4.1806092.A.T	C(A>T)G			1	0
SF3B1	G742D	8	chr2.198266611.C.T	A(C>T)C			1	0
TP53	Q317*	32	chr17.7576897.G.A	T(G>A)G			1	0
TGFBR1	S241L	12	chr9.101900288.C.T	T(C>T)G			1	1
CDKN2A	E120*	16	chr9.21971000.C.A	T(C>A)C			1	0
PAX5	V26G	9	chr9.37020768.A.C	A(A>C)C			1	0
FBXW7	S582L	10	chr4.153245446.G.A	C(G>A)A			1	1
RHOA	A161V	5	chr3.49397742.G.A	T(G>A)C			1	1
EP300	Y1414C	6	chr22.41565575.A.G	T(A>G)T			1	0
ERBB3	E332K	13	chr12.56482537.G.A	T(G>A)A			1	0
MET	M1250T	6	chr7.116423474.T.C	A(T>C)G			1	0
ATM	R250*	14	chr11.108115600.C.T	T(C>T)G			1	1
PIK3R1	R348*	16	chr5.67588951.C.T	T(C>T)G			1	1
SMARCA4	M781I	6	chr19.11123693.G.A;chr19.11123693.G.C;chr19.11123693.G.T	T(G>A)G	T(G>C)G	T(G>T)G	3	0
FBXW7	Y545C	6	chr4.153247168.T.C	A(T>C)A			1	0
ERBB4	L798R	7	chr2.212426722.A.C	A(A>C)G			1	0
VHL	S111N	6	chr3.10183863.G.A	A(G>A)C			1	1
KIT	Y823D	5	chr4.55599341.T.G	T(T>G)A			1	0
BCL6	R594Q	10	chr3.187443345.C.T	T(C>T)G			1	1
ARID1A	R1721*	13	chr1.27105550.C.T	C(C>T)G			1	1
ATM	N2875S	5	chr11.108218045.A.G	A(A>G)T			1	0
PTPN11	E69K	9	chr12.112888189.G.A	G(G>A)A			1	0
FUBP1	R430C	11	chr1.78428511.G.A	C(G>A)A			1	1
FBXW7	G423V	8	chr4.153249510.C.A	T(C>A)C			1	0
APC	E1397*	19	chr5.112175480.G.T	T(G>T)A			1	0
APC	Y935*	13	chr5.112174096.C.A;chr5.112174096.C.G	A(C>A)A	A(C>G)A		2	0
ACVR1	R206H	8	chr2.158630626.C.T	G(C>T)G			1	1
SMARCA4	R1189Q	7	chr19.11143985.G.A	C(G>A)A			1	1
PTPN11	G503V	8	chr12.112926888.G.T	G(G>T)G			1	0
ARID1A	G2087R	10	chr1.27106648.G.A	C(G>A)G			1	1
CASP8	R292W	9	chr2.202141586.C.T	T(C>T)G			1	1
TP53	P152L	28	chr17.7578475.G.A	C(G>A)G			1	1
RB1	R552*	13	chr13.48955538.C.T	A(C>T)G			1	1
ARID1A	R1335*	12	chr1.27100207.C.T	A(C>T)G			1	1
MTOR	E1799K	12	chr1.11190804.C.T	T(C>T)G			1	1
KMT2D	R5179H	5	chr12.49420213.C.T	A(C>T)G			1	1
EZH2	K515R	8	chr7.148512600.T.C	C(T>C)T			1	0
ERBB3	M91I	12	chr12.56478817.G.A;chr12.56478817.G.C;chr12.56478817.G.T	T(G>A)A	T(G>C)A	T(G>T)A	3	0
PBRM1	R1160*	11	chr3.52610695.G.A	C(G>A)A			1	1
SPOP	M117V	7	chr17.47696599.T.C	A(T>C)A			1	0
PIK3CD	E1021K	8	chr1.9787030.G.A	C(G>A)A			1	1
TP53	H168R	12	chr17.7578427.T.C	G(T>C)G			1	0
TP53	W146*	24	chr17.7578492.C.T;chr17.7578493.C.T	C(C>T)C	C(C>T)A		2	0
TP53	R267W	15	chr17.7577139.G.A	C(G>A)T			1	1
TP53	R267P	8	chr17.7577138.C.G	C(C>G)G			1	0
TP53	R267L	5	chr17.7577138.C.A	C(C>A)G			1	0
TP53	A161T	12	chr17.7578449.C.T	G(C>T)C			1	1
TP53	A161D	7	chr17.7578448.G.T	G(G>T)C			1	0
SMO	L412F	5	chr7.128846398.C.T	G(C>T)T			1	1
PIK3CA	E365K	11	chr3.178922324.G.A	A(G>A)A			1	0
CTCF	R448*	8	chr16.67655479.C.T	C(C>T)G			1	1
PRKCI	R480C	5	chr3.170013719.C.T	T(C>T)G			1	1
PIK3R2	G373R	9	chr19.18273784.G.A	C(G>A)G			1	1
PIK3R2	D557Y	5	chr19.18278049.G.T	C(G>T)A			1	0
PTPRT	E548K	11	chr20.40980844.C.T	T(C>T)A			1	0
TP53	K164E	9	chr17.7578440.T.C	T(T>C)G			1	0
RHOA	E47K	11	chr3.49412884.C.T	T(C>T)G			1	1
APC	Q1406*	18	chr5.112175507.C.T	T(C>T)A			1	0
SMAD4	Q534*	9	chr18.48604778.C.T	C(C>T)A			1	0
STK11	S216F	11	chr19.1220629.C.T	T(C>T)C			1	0
CTNNB1	I35S	7	chr3.41266107.T.G	A(T>G)C			1	0
TP53	Q144*	17	chr17.7578500.G.A	T(G>A)C			1	1
TP53	F109S	6	chr17.7579361.A.G	G(A>G)A			1	0
TP53	F109C	5	chr17.7579361.A.C	G(A>C)A			1	0
TP53	G105C	13	chr17.7579374.C.A	C(C>A)C			1	0
TP53	G105V	6	chr17.7579373.C.A	G(C>A)C			1	0
APC	Q1338*	17	chr5.112175303.C.T	G(C>T)A			1	1
SMAD4	E330K	6	chr18.48591825.G.A	T(G>A)A			1	0
TP53	T125M	16	chr17.7579313.G.A	C(G>A)T			1	1
TP53	T125R	6	chr17.7579313.G.C	C(G>C)T			1	0
PTEN	G127R	5	chr10.89692895.G.A	T(G>A)G			1	0
PTEN	G127E	5	chr10.89692896.G.A	G(G>A)A			1	0
MYC	S161L	11	chr8.128750945.C.T	T(C>T)A			1	0
KRAS	L19F	12	chr12.25398262.C.A;chr12.25398262.C.G	T(C>A)A	T(C>G)A		2	0
PIK3CA	R115L	7	chr3.178916957.G.T	C(G>T)A			1	0
TP53	E294*	32	chr17.7577058.C.A	T(C>A)C			1	0
PREX2	L50V	5	chr8.68930087.T.G	C(T>G)T			1	0
HIST1H3C	K37M	5	chr6.26045748.A.T	A(A>T)G			1	0
RHOA	Y34C	5	chr3.49412922.T.C	A(T>C)A			1	0
SMARCA4	R1243W	9	chr19.11144146.C.T	G(C>T)G			1	1
TP53	Q167*	19	chr17.7578431.G.A	T(G>A)T			1	0
RHOA	L57V	6	chr3.49405969.A.C	A(A>C)A			1	0
VHL	D121Y	6	chr3.10188218.G.T	A(G>T)A			1	0
FBXW7	D520N	6	chr4.153247244.C.T	T(C>T)A			1	0
VHL	W88*	5	chr3.10183794.G.A	T(G>A)G			1	0
TP53	P250L	22	chr17.7577532.G.A	G(G>A)G			1	0
CDKN2A	Y129*	6	chr9.21970971.G.C;chr9.21970971.G.T	G(G>C)T	G(G>T)T		2	0
STK11	Q220*	9	chr19.1220640.C.T	C(C>T)A			1	0
NOTCH2	R2400*	6	chr1.120458147.G.A	C(G>A)C			1	1
EGFR	H304Y	5	chr7.55223543.C.T	T(C>T)A			1	0
TP53	E271K	27	chr17.7577127.C.T	T(C>T)A			1	0
TP53	E271*	14	chr17.7577127.C.A	T(C>A)A			1	0
TP53	E271Q	7	chr17.7577127.C.G	T(C>G)A			1	0
TP53	E271V	5	chr17.7577126.T.A	C(T>A)C			1	0
VHL	S68*	7	chr3.10183734.C.A	T(C>A)G			1	0
RHOA	E40Q	9	chr3.49412905.C.G	T(C>G)A			1	0
VHL	V74D	5	chr3.10183752.T.A	G(T>A)C			1	0
ASXL2	E330K	7	chr2.25978935.C.T	T(C>T)A			1	0
PAK7	M173I	12	chr20.9561263.C.T	T(C>T)A			1	0
APC	E1353*	15	chr5.112175348.G.T	T(G>T)A			1	0
PBRM1	R710*	10	chr3.52643768.G.A	C(G>A)A			1	1
SUZ12	R101*	5	chr17.30267331.C.T	T(C>T)G			1	1
XPO1	R749Q	10	chr2.61715367.C.T	T(C>T)G			1	1
RB1	R579*	11	chr13.49027168.C.T	C(C>T)G			1	1
PIM1	G28D	6	chr6.37138549.G.A	G(G>A)C			1	1
SF3B1	G740E	7	chr2.198266713.C.T	T(C>T)C			1	0
ATRX	R1426*	11	chrX.76909629.G.A	C(G>A)C			1	1
TP53	V172F	12	chr17.7578416.C.A	A(C>A)C			1	0
TP53	V172D	5	chr17.7578415.A.T	A(A>T)C			1	0
STAT3	S614R	5	chr17.40475068.G.C;chr17.40475068.G.T;chr17.40475070.T.G	T(G>C)C	T(G>T)C	C(T>G)G	3	0
CIC	R201W	6	chr19.42791715.C.T	C(C>T)G			1	1
PDGFRA	E229K	5	chr4.55131142.G.A	G(G>A)A			1	0
MAP2K1	C121S	5	chr15.66729153.T.A;chr15.66729154.G.C	G(T>A)G	T(G>C)C		2	0
TP53	T155N	8	chr17.7578466.G.T	G(G>T)T			1	0
TP53	T155P	7	chr17.7578467.T.G	G(T>G)G			1	0
PTPRD	S431L	15	chr9.8518099.G.A	C(G>A)A			1	1
CASP8	R127Q	8	chr2.202131412.G.A	C(G>A)A			1	1
CASP8	R127*	5	chr2.202131411.C.T	C(C>T)G			1	1
BCL2	A131D	7	chr18.60985508.G.T	G(G>T)C			1	0
TGFBR2	D471N	10	chr3.30715678.G.A	C(G>A)A			1	1
TP53	W53*	22	chr17.7579528.C.T;chr17.7579529.C.T	A(C>T)C	C(C>T)A		2	0
TP53	Q331*	39	chr17.7576855.G.A	T(G>A)A			1	0
TP53	Q331H	8	chr17.7576853.C.A;chr17.7576853.C.G	C(C>A)T	C(C>G)T		2	0
MTOR	M2327I	5	chr1.11177096.C.G;chr1.11177096.C.T	A(C>G)A	A(C>T)A		2	0
DNMT1	E51K	5	chr19.10291528.C.T	T(C>T)G			1	1
EP300	C1164Y	5	chr22.41553402.G.A	T(G>A)T			1	0
PTEN	R335*	12	chr10.89720852.C.T	C(C>T)G			1	1
FGFR2	Y375C	5	chr10.123274794.T.C	G(T>C)A			1	0
MST1	G673S	6	chr3.49721622.C.T	C(C>T)C			1	0
MAP3K1	S1330L	8	chr5.56181765.C.T	T(C>T)G			1	1
FOXA1	S250F	5	chr14.38061240.G.A	G(G>A)A			1	0
SMAD4	W524C	6	chr18.48604750.G.C;chr18.48604750.G.T	G(G>C)A	G(G>T)A		2	0
TP53	L257Q	7	chr17.7577511.A.T	C(A>T)G			1	0
VHL	R161*	7	chr3.10191488.C.T	G(C>T)G			1	1
KEAP1	R470C	7	chr19.10600447.G.A	C(G>A)A			1	1
GNAQ	R183Q	6	chr9.80412493.C.T	T(C>T)G			1	1
PTEN	G165E	6	chr10.89711876.G.A	G(G>A)A			1	0
PTEN	G165R	5	chr10.89711875.G.A	G(G>A)G			1	0
ARID1A	R1722*	10	chr1.27105553.C.T	A(C>T)G			1	1
APC	E1408*	13	chr5.112175513.G.T	T(G>T)A			1	0
FAT1	R1627*	7	chr4.187542861.G.A	C(G>A)A			1	1
FAT1	R1627Q	5	chr4.187542860.C.T	T(C>T)G			1	1
AKT1	Q79K	6	chr14.105243048.G.T	T(G>T)C			1	0
FBXW7	R278*	10	chr4.153258983.G.A	C(G>A)T			1	1
PTEN	Q171*	13	chr10.89711893.C.T	T(C>T)A			1	0
PIK3CA	M1004I	8	chr3.178951957.G.A;chr3.178951957.G.T	T(G>A)A	T(G>T)A		2	0
FBXW7	R224Q	5	chr4.153268137.C.T	T(C>T)G			1	1
FBXW7	R224*	5	chr4.153268138.G.A	C(G>A)G			1	1
TP53	N131I	8	chr17.7578538.T.A	G(T>A)T			1	0
TP53	L265P	8	chr17.7577144.A.G	C(A>G)G			1	0
TP53	Q192*	43	chr17.7578275.G.A	T(G>A)A			1	0
PIK3CA	E39K	5	chr3.178916728.G.A	T(G>A)A			1	0
ARID1A	R1461*	9	chr1.27101099.C.T	C(C>T)G			1	1
PIK3CA	C604R	5	chr3.178937422.T.C	C(T>C)G			1	0
TP53	E198*	26	chr17.7578257.C.A	T(C>A)C			1	0
FOXP1	R514H	6	chr3.71021817.C.T	A(C>T)G			1	1
KRAS	Q22K	5	chr12.25398255.G.T	T(G>T)T			1	0
RICTOR	S1101L	9	chr5.38950648.G.A	C(G>A)A			1	1
PTPRT	L695F	6	chr20.40944419.G.A	A(G>A)A			1	0
TP53	G262V	17	chr17.7577153.C.A	A(C>A)C			1	0
PTEN	S170N	6	chr10.89711891.G.A	A(G>A)T			1	0
TP53	F113V	6	chr17.7579350.A.C	A(A>C)G			1	0
TP53	F113C	6	chr17.7579349.A.C	G(A>C)A			1	0
GNAS	R160C	7	chr20.57480483.C.T	G(C>T)G			1	1
PPP6C	S270L	7	chr9.127912061.G.A	C(G>A)A			1	1
PIK3CA	P471L	5	chr3.178928226.C.T	C(C>T)A			1	0
APC	E1379*	11	chr5.112175426.G.T	G(G>T)A			1	0
SMARCA4	R1135W	5	chr19.11141426.C.T	C(C>T)G			1	1
KEAP1	G480W	7	chr19.10600417.C.A	C(C>A)G			1	0
MAP2K1	Q56P	5	chr15.66727451.A.C	C(A>C)G			1	0
CDH1	R335*	6	chr16.68845757.C.T	C(C>T)G			1	1
PIK3CA	T1052K	5	chr3.178952100.C.A	A(C>A)A			1	0
NF1	R1241*	7	chr17.29562641.C.T	T(C>T)G			1	1
JUN	E112K	5	chr1.59248409.C.T	T(C>T)G			1	1
CTCF	S354F	9	chr16.67650756.C.T	T(C>T)C			1	0
RB1	R455*	9	chr13.48953760.C.T	C(C>T)G			1	1
ALK	R401*	9	chr2.29606679.G.A	C(G>A)A			1	1
ARID2	R314C	8	chr12.46230691.C.T	T(C>T)G			1	1
KLF4	K409Q	5	chr9.110249348.T.G	T(T>G)T			1	0
STK11	E165*	6	chr19.1220400.G.T	G(G>T)A			1	0
AKT3	E17K	9	chr1.243859016.C.T	T(C>T)T			1	0
STK11	P221L	6	chr19.1220644.C.T	C(C>T)G			1	1
TP53	L111P	7	chr17.7579355.A.G	C(A>G)G			1	0
TP53	L111R	6	chr17.7579355.A.C	C(A>C)G			1	0
TP53	Q104*	22	chr17.7579377.G.A	T(G>A)G			1	0
MAP2K4	S184L	7	chr17.12011144.C.T	T(C>T)G			1	1
SMARCA4	R973W	5	chr19.11134251.C.T	G(C>T)G			1	1
SMARCA4	R973Q	5	chr19.11134252.G.A	C(G>A)G			1	1
FOXA1	D226N	5	chr14.38061313.C.T	T(C>T)A			1	0
ERBB2	R103Q	6	chr17.37864656.G.A	C(G>A)A			1	1
PTEN	Y336*	7	chr10.89720857.C.A;chr10.89720857.C.G	A(C>A)T	A(C>G)T		2	0
PTEN	P38S	7	chr10.89653814.C.T	T(C>T)C			1	0
KDR	R1032Q	8	chr4.55956220.C.T	T(C>T)G			1	1
TP53	D259Y	19	chr17.7577506.C.A	T(C>A)T			1	0
TP53	D259V	7	chr17.7577505.T.A	G(T>A)C			1	0
GNA11	R183C	5	chr19.3115012.C.T	C(C>T)G			1	1
CDKN2A	P48L	10	chr9.21974684.G.A	C(G>A)G			1	1
KMT2D	R2685*	7	chr12.49433394.G.A	C(G>A)C			1	1
RB1	R467*	9	chr13.48954198.C.T	A(C>T)G			1	1
MGA	R1242*	9	chr15.42021428.C.T	T(C>T)G			1	1
TP63	E609K	11	chr3.189612073.G.A	C(G>A)A			1	1
TP53	I251N	5	chr17.7577529.A.T	G(A>T)T			1	0
TP53	I251F	5	chr17.7577530.T.A	A(T>A)G			1	0
PIK3CA	G364R	5	chr3.178922321.G.A	A(G>A)G			1	0
DIS3	R689Q	8	chr13.73337650.C.T	T(C>T)G			1	1
DIS3	R382Q	8	chr13.73347916.C.T	T(C>T)G			1	1
GLI1	R380Q	6	chr12.57861838.G.A	C(G>A)A			1	1
CASP8	R491*	9	chr2.202150030.C.T	G(C>T)G			1	1
MAP2K4	R134W	9	chr17.11998898.C.T	T(C>T)G			1	1
BCL6	R618C	6	chr3.187442854.G.A	C(G>A)G			1	1
FOXL2	E118K	6	chr3.138665213.C.T	T(C>T)G			1	1
APC	R213*	51	chr5.112116592.C.T	A(C>T)G			1	1
APC	Q1303*	10	chr5.112175198.C.T	G(C>T)A			1	1
APC	Q1294*	7	chr5.112175171.C.T	A(C>T)A			1	0
APC	Q1328*	8	chr5.112175273.C.T	A(C>T)A			1	0
TP63	S365L	7	chr3.189586470.C.T	T(C>T)G			1	1
RB1	R787*	9	chr13.49039374.C.T	T(C>T)G			1	1
SDHA	V644M	6	chr5.256470.G.A	C(G>A)T			1	1
RIT1	M90I	11	chr1.155874261.C.A;chr1.155874261.C.G;chr1.155874261.C.T	T(C>A)A	T(C>G)A	T(C>T)A	3	0
PTEN	W111*	6	chr10.89692848.G.A;chr10.89692849.G.A	T(G>A)G	G(G>A)C		2	1
PTEN	C71Y	5	chr10.89690805.G.A	T(G>A)T			1	0
RB1	R445*	10	chr13.48953730.C.T	G(C>T)G			1	1
HIST1H3B	E106K	8	chr6.26031973.C.T	T(C>T)A			1	0
HIST1H3B	E106Q	5	chr6.26031973.C.G	T(C>G)A			1	0
CDKN2A	S12*	8	chr9.21974792.G.T	C(G>T)A			1	0
FOXP1	S448L	8	chr3.71026984.G.A	C(G>A)A			1	1
RNF43	R371*	9	chr17.56436026.G.A	C(G>A)T			1	1
ERBB4	K1002T	5	chr2.212285296.T.G	C(T>G)T			1	0
FBXW7	R14Q	6	chr4.153332915.C.T	T(C>T)G			1	1
TP53	D208V	7	chr17.7578226.T.A	G(T>A)C			1	0
PIK3CA	P539R	6	chr3.178936074.C.G	C(C>G)T			1	0
DICER1	D1709N	10	chr14.95560464.C.T	T(C>T)T			1	0
BCL2	G33R	5	chr18.60985803.C.T	C(C>T)C			1	0
RBM10	R153*	7	chrX.47038526.C.T	C(C>T)G			1	1
TP53	N247I	8	chr17.7577541.T.A	G(T>A)T			1	0
TP53	R181H	9	chr17.7578388.C.T	G(C>T)G			1	1
TP53	R181C	9	chr17.7578389.G.A	C(G>A)C			1	1
TP53	R181P	8	chr17.7578388.C.G	G(C>G)G			1	0
TP53	Y107*	8	chr17.7579366.G.C;chr17.7579366.G.T	C(G>C)T	C(G>T)T		2	0
TP53	Y107D	6	chr17.7579368.A.C	T(A>C)G			1	0
TGFBR2	E544K	5	chr3.30732942.G.A	T(G>A)A			1	0
ASXL2	R357*	9	chr2.25976476.G.A	C(G>A)A			1	1
TP53	K120E	5	chr17.7579329.T.C	T(T>C)G			1	0
TP53	I254S	7	chr17.7577520.A.C	G(A>C)T			1	0
CDH1	R63*	6	chr16.68835596.C.T	T(C>T)G			1	1
PIK3CA	E970K	9	chr3.178948136.G.A	A(G>A)A			1	0
FBXW7	S546L	7	chr4.153247165.G.A	T(G>A)A			1	0
ANKRD11	K369R	5	chr16.89351844.T.C	C(T>C)T			1	0
PIK3CB	R321Q	9	chr3.138453486.C.T	T(C>T)G			1	1
ETV6	R369W	6	chr12.12037474.C.T	C(C>T)G			1	1
TGFBR2	R520*	8	chr3.30729962.C.T	T(C>T)G			1	1
NF1	R461*	7	chr17.29533378.C.T	A(C>T)G			1	1
PTPN11	T468M	6	chr12.112926270.C.T	A(C>T)G			1	1
CDK12	R890H	5	chr17.37667784.G.A	C(G>A)C			1	1
CTLA4	T17A	5	chr2.204732714.A.G	T(A>G)C			1	0
MSH2	E580*	6	chr2.47698180.G.T	A(G>T)A			1	0
CTNNB1	R535*	5	chr3.41275708.C.T	A(C>T)G			1	1
SMARCD1	R183Q	5	chr12.50481162.G.A	C(G>A)A			1	1
PIM1	L2F	5	chr6.37138355.C.T	G(C>T)T			1	1
IL7R	R206*	8	chr5.35873660.C.T	T(C>T)G			1	1
DICER1	S1344L	6	chr14.95569702.G.A	T(G>A)A			1	0
PPM1D	E525*	8	chr17.58740668.G.T	A(G>T)A			1	0
NOTCH1	R365C	6	chr9.139413049.G.A	C(G>A)G			1	1
DNMT1	E432K	7	chr19.10267124.C.T	T(C>T)G			1	1
RNF43	R145*	9	chr17.56440904.G.A	C(G>A)A			1	1
RNF43	R132*	11	chr17.56440943.G.A	C(G>A)C			1	1
POLE	E18K	7	chr12.133263850.C.T	T(C>T)G			1	1
NOTCH1	G310R	6	chr9.139413214.C.T	C(C>T)G			1	1
ERBB3	R475W	8	chr12.56487277.C.T	T(C>T)G			1	1
SMAD3	R268C	7	chr15.67473722.C.T	G(C>T)G			1	1
SMAD3	R287W	6	chr15.67473779.C.T	A(C>T)G			1	1
SMARCA4	E821K	7	chr19.11129655.G.A	C(G>A)A			1	1
ALK	R395H	6	chr2.29606696.C.T	A(C>T)G			1	1
NOTCH1	E455K	6	chr9.139412282.C.T	T(C>T)G			1	1
TP53	Q165*	15	chr17.7578437.G.A	T(G>A)C			1	1
ARID1A	Q1142*	6	chr1.27099008.C.T	G(C>T)A			1	1
RPTOR	R139H	8	chr17.78681708.G.A	C(G>A)C			1	1
PTPRT	R364Q	6	chr20.41306568.C.T	T(C>T)G			1	1
SMARCB1	R374Q	5	chr22.24176330.G.A	C(G>A)G			1	1
TGFBR1	R487Q	5	chr9.101911535.G.A	C(G>A)G			1	1
SMAD4	A118V	11	chr18.48575159.C.T	G(C>T)G			1	1
VHL	L169P	5	chr3.10191513.T.C	C(T>C)A			1	0
PPP2R1A	R182W	6	chr19.52715979.C.T	G(C>T)G			1	1
RPS6KA4	S236L	5	chr11.64129169.C.T	T(C>T)G			1	1
EIF1AX	G8R	5	chrX.20156735.C.G;chrX.20156735.C.T	C(C>G)T	C(C>T)T		2	0
TP53	P190L	12	chr17.7578280.G.A	A(G>A)G			1	0
KMT2A	R1264*	5	chr11.118352585.C.T	A(C>T)G			1	1
TP53	V197L	5	chr17.7578260.C.A	A(C>A)T			1	0
ATRX	R907*	6	chrX.76938029.G.A	C(G>A)A			1	1
TP53	M133K	5	chr17.7578532.A.T	C(A>T)T			1	0
NF1	R1870Q	7	chr17.29654857.G.A	C(G>A)G			1	1
EPHA7	G656E	6	chr6.93967960.C.T	C(C>T)C			1	0
TP53	H178D	5	chr17.7578398.G.C	T(G>C)G			1	0
TP53	V218G	5	chr17.7578196.A.C	C(A>C)C			1	0
KMT2C	R56Q	6	chr7.152055755.C.T	T(C>T)G			1	1
KMT2C	R4549C	7	chr7.151845367.G.A	C(G>A)A			1	1
ATM	R2832C	6	chr11.108216545.C.T	C(C>T)G			1	1
TET2	R550*	7	chr4.106156747.C.T	A(C>T)G			1	1
SMAD2	R182*	7	chr18.45394805.G.A	C(G>A)G			1	1
ERBB2	I767M	9	chr17.37880257.C.G	T(C>G)T			1	0
PGR	R836Q	8	chr11.100912815.C.T	T(C>T)G			1	1
EPHA3	R136*	11	chr3.89259262.C.T	T(C>T)G			1	1
PBRM1	R921*	7	chr3.52637555.G.A	C(G>A)T			1	1
APC	S1315*	8	chr5.112175235.C.A;chr5.112175235.C.G	T(C>A)A	T(C>G)A		2	0
SMAD2	R321Q	5	chr18.45374881.C.T	T(C>T)G			1	1
IKZF1	E304K	7	chr7.50467675.G.A	C(G>A)A			1	1
CASP8	R494*	8	chr2.202150039.C.T	T(C>T)G			1	1
SMAD4	S178*	9	chr18.48581229.C.A;chr18.48581229.C.G	T(C>A)A	T(C>G)A		2	0
PTEN	W274*	6	chr10.89720670.G.A;chr10.89720671.G.A	T(G>A)G	G(G>A)G		2	0
PTEN	Y65*	5	chr10.89685300.C.A;chr10.89685300.C.G	A(C>A)A	A(C>G)A		2	0

## Sheet: S4
Table S4. List of 47 hybridization capture samples. Related to Fig. 5 and Fig. 7.
SJALL018366_D1
SJALL018366_O1
SJALL018366_O2
SJALL018366_O4
SJALL018366_O5
SJALL018366_O6
SJALL018366_R1
SJALL018372_D1
SJALL018372_G1
SJALL018372_O1
SJALL018372_O2
SJALL018372_O3
SJALL018372_O4
SJALL018372_O5
SJALL018372_O6
SJALL018372_O7
SJALL018372_R1
SJALL018376_D1
SJALL018376_O4
SJALL018376_O5
SJALL018376_R1
SJALL040462_D1
SJALL040462_G1
SJALL040462_O1
SJALL040462_O2
SJALL040462_O3
SJALL040462_O4
SJALL040462_O5
SJALL040462_O6
SJALL040462_O7
SJALL040462_O8
SJALL040462_R1
SJBALL013787_D1
SJBALL013787_G1
SJBALL013787_O1
SJBALL013787_O10
SJBALL013787_O11
SJBALL013787_O12
SJBALL013787_O13
SJBALL013787_O2
SJBALL013787_O3
SJBALL013787_O5
SJBALL013787_O6
SJBALL013787_O7
SJBALL013787_O8
SJBALL013787_O9
SJBALL013787_R1

## Sheet: S5
Table S5. List of 1663 whole genome samples. Related to Fig. 7.
SJACT019754_G1
SJALL000003_G1
SJALL000135_G1
SJALL003413_G2
SJALL003422_G3
SJALL003449_G1
SJALL003454_G1
SJALL003456_G1
SJALL003606_G1
SJALL003624_G1
SJALL003626_G1
SJALL003802_G1
SJALL003817_G1
SJALL003838_G1
SJALL003843_G1
SJALL003857_G1
SJALL004032_G1
SJALL004060_G1
SJALL004182_G1
SJALL004190_G1
SJALL004196_G1
SJALL004201_G2
SJALL004247_G3
SJALL004706_G1
SJALL004707_G2
SJALL004720_G2
SJALL004732_G1
SJALL004739_G1
SJALL004746_G1
SJALL004748_G1
SJALL004779_G3
SJALL004784_G3
SJALL004836_G1
SJALL005047_G1
SJALL005048_G1
SJALL005067_G1
SJALL005068_G1
SJALL005077_G1
SJALL005157_G1
SJALL005319_G2
SJALL005347_G1
SJALL005362_G1
SJALL005377_G2
SJALL005403_G2
SJALL005422_G2
SJALL005424_G2
SJALL005425_G2
SJALL005426_G2
SJALL010138_G1
SJALL017869_G1
SJALL017872_G1
SJALL017873_G1
SJALL017875_G1
SJALL017878_G1
SJALL017879_G1
SJALL017883_G1
SJALL017884_G2
SJALL017885_G1
SJALL017886_G1
SJALL017887_G1
SJALL017888_G1
SJALL017889_G1
SJALL017890_G1
SJALL018399_G1
SJALL018402_G1
SJALL018404_G1
SJALL018410_G1
SJALL018412_G1
SJALL018414_G1
SJALL018416_G1
SJALL018417_G1
SJALL018419_G1
SJALL018420_G1
SJALL018421_G1
SJALL018422_G1
SJALL018424_G1
SJALL018426_G1
SJALL018427_G1
SJALL018430_G1
SJALL018434_G1
SJALL018435_G1
SJALL018436_G1
SJALL018441_G1
SJALL018442_G1
SJALL018445_G1
SJALL018446_G2
SJALL018447_G1
SJALL018449_G1
SJALL018450_G1
SJALL018454_G1
SJALL018456_G1
SJALL018457_G1
SJALL018459_G1
SJALL018460_G1
SJALL018461_G1
SJALL018462_G1
SJALL018464_G1
SJALL018466_G1
SJALL018467_G1
SJALL018471_G1
SJALL018473_G1
SJALL018476_G1
SJALL018477_G1
SJALL018479_G1
SJALL018484_G1
SJALL018486_G1
SJALL018487_G1
SJALL018493_G1
SJALL018495_G1
SJALL018496_G1
SJALL018497_G1
SJALL018501_G1
SJALL018502_G1
SJALL018504_G1
SJALL018507_G1
SJALL018508_G1
SJALL018509_G1
SJALL018518_G1
SJALL018519_G1
SJALL018524_G1
SJALL018526_G1
SJALL018527_G1
SJALL018528_G1
SJALL018533_G1
SJALL018534_G1
SJALL018537_G1
SJALL018541_G1
SJALL018543_G1
SJALL018921_G1
SJALL018922_G1
SJALL018923_G1
SJALL018924_G1
SJALL018925_G1
SJALL018926_G1
SJALL018927_G1
SJALL018928_G1
SJALL018930_G1
SJALL018931_G1
SJALL018932_G1
SJALL018935_G1
SJALL018936_G1
SJALL018937_G1
SJALL018939_G1
SJALL018940_G1
SJALL018941_G1
SJALL018942_G1
SJALL018943_G1
SJALL018944_G1
SJALL018946_G1
SJALL018948_G1
SJALL018949_G1
SJALL018950_G1
SJALL018951_G1
SJALL018953_G1
SJALL018954_G1
SJALL018955_G1
SJALL018956_G1
SJALL018959_G1
SJALL018960_G1
SJALL018961_G1
SJALL018962_G1
SJALL018963_G1
SJALL018964_G1
SJALL018965_G1
SJALL018966_G1
SJALL018967_G1
SJALL018968_G1
SJALL018972_G1
SJALL018973_G1
SJALL018974_G1
SJALL018976_G1
SJALL018977_G1
SJALL018982_G1
SJALL018983_G1
SJALL018986_G1
SJALL018991_G1
SJALL018992_G1
SJALL018993_G1
SJALL018994_G1
SJALL018995_G1
SJALL018996_G1
SJALL018998_G1
SJALL019007_G1
SJALL019008_G1
SJALL019009_G1
SJALL019010_G1
SJALL019012_G1
SJALL019014_G1
SJALL019015_G1
SJALL019016_G1
SJALL019017_G1
SJALL019019_G1
SJALL019020_G1
SJALL019021_G1
SJALL019022_G1
SJALL019023_G1
SJALL019024_G1
SJALL019026_G1
SJALL019028_G1
SJALL019029_G1
SJALL019031_G1
SJALL019032_G1
SJALL019033_G1
SJALL019035_G1
SJALL019036_G1
SJALL019038_G1
SJALL019041_G1
SJALL019043_G1
SJALL019044_G1
SJALL019045_G1
SJALL019047_G1
SJALL019050_G1
SJALL019051_G1
SJALL019053_G1
SJALL019054_G1
SJALL019055_G1
SJALL019056_G1
SJALL019057_G1
SJALL019058_G1
SJALL019060_G1
SJALL019062_G1
SJALL019064_G1
SJALL019067_G1
SJALL019068_G1
SJALL019070_G1
SJALL019072_G1
SJALL019073_G1
SJALL019075_G1
SJALL019077_G1
SJALL019078_G1
SJALL019080_G1
SJALL019082_G1
SJALL019088_G1
SJALL019091_G1
SJALL019092_G1
SJALL019095_G1
SJALL019096_G1
SJALL019098_G1
SJALL019709_G1
SJALL019710_G1
SJALL019711_G1
SJALL019714_G1
SJALL019717_G1
SJALL019718_G1
SJALL019720_G1
SJALL019723_G1
SJALL019726_G1
SJALL019736_G1
SJALL019742_G1
SJALL019744_G1
SJALL019745_G1
SJALL019748_G1
SJALL019751_G1
SJALL021900_G1
SJALL021915_G2
SJALL022044_G2
SJALL040940_G1
SJALL040941_G1
SJALL040942_G1
SJALL040943_G1
SJALL040944_G1
SJALL040945_G1
SJALL040946_G1
SJALL040947_G1
SJALL040950_G1
SJALL040953_G1
SJALL040954_G1
SJALL040959_G1
SJALL040960_G1
SJALL040964_G1
SJALL040970_G1
SJALL040972_G1
SJALL040978_G1
SJALL040980_G1
SJALL040982_G1
SJALL040983_G1
SJALL040985_G1
SJALL041014_G1
SJALL041016_G1
SJALL041022_G1
SJALL041024_G1
SJALL041026_G1
SJALL041027_G1
SJALL041028_G1
SJALL041030_G1
SJALL041031_G1
SJALL041033_G1
SJALL041034_G1
SJALL041036_G1
SJALL041037_G1
SJALL041038_G1
SJALL041041_G1
SJALL041044_G1
SJALL041049_G1
SJALL041168_G1
SJALL041170_G1
SJALL041172_G1
SJALL041173_G1
SJALL041174_G1
SJALL041177_G1
SJALL041178_G1
SJALL041180_G1
SJALL041182_G1
SJALL041183_G1
SJALL041187_G1
SJALL041188_G1
SJALL041190_G1
SJALL041192_G1
SJALL041194_G1
SJALL041195_G1
SJALL041197_G1
SJALL041198_G1
SJALL041199_G1
SJALL041200_G1
SJALL041201_G1
SJALL041205_G1
SJALL041207_G1
SJALL041210_G1
SJALL041212_G1
SJALL041214_G1
SJALL041215_G1
SJALL041217_G1
SJALL041218_G1
SJALL041221_G1
SJALL041222_G1
SJALL041225_G1
SJALL041226_G1
SJALL041227_G1
SJALL041228_G1
SJALL041231_G1
SJALL041235_G1
SJALL041237_G1
SJALL041240_G1
SJALL041241_G1
SJALL041242_G1
SJALL041244_G1
SJALL041245_G1
SJALL041251_G1
SJALL041255_G1
SJALL041256_G1
SJALL041257_G1
SJALL041260_G1
SJALL041261_G1
SJALL041262_G1
SJALL041263_G1
SJALL041264_G1
SJALL041265_G1
SJALL041268_G1
SJALL041269_G1
SJALL041270_G1
SJALL041273_G1
SJALL041278_G1
SJALL041280_G1
SJALL041281_G1
SJALL041282_G1
SJALL041283_G1
SJALL041284_G1
SJALL041285_G1
SJALL041286_G1
SJALL041287_G1
SJALL041288_G1
SJALL041290_G1
SJALL041293_G1
SJALL041294_G1
SJALL041296_G1
SJALL041297_G1
SJALL041303_G1
SJALL041304_G1
SJALL041305_G1
SJALL041306_G1
SJALL041308_G1
SJALL041309_G1
SJALL041310_G1
SJALL041311_G1
SJALL041312_G1
SJALL041313_G1
SJALL041314_G1
SJALL041315_G1
SJALL041316_G1
SJALL041318_G1
SJALL041320_G1
SJALL041321_G1
SJALL041322_G1
SJALL041324_G1
SJALL041325_G1
SJALL041327_G1
SJALL041329_G1
SJALL041330_G1
SJALL041331_G1
SJALL041332_G1
SJALL041333_G1
SJALL041334_G1
SJALL041335_G1
SJALL041338_G1
SJALL041339_G1
SJALL041340_G1
SJALL041342_G1
SJALL041343_G1
SJALL041344_G1
SJALL041345_G1
SJALL041347_G1
SJALL041349_G1
SJALL041351_G1
SJALL041359_G1
SJALL041360_G1
SJALL041361_G1
SJALL041363_G1
SJALL041364_G1
SJALL041365_G1
SJALL041366_G1
SJALL041367_G1
SJALL041368_G1
SJALL041369_G2
SJALL041370_G2
SJALL041371_G1
SJALL041376_G1
SJALL041377_G1
SJALL041378_G1
SJALL041379_G1
SJALL041381_G1
SJALL041386_G1
SJALL041389_G1
SJALL041390_G1
SJALL041391_G1
SJALL041392_G1
SJALL041393_G2
SJALL041395_G2
SJALL041398_G1
SJALL041400_G1
SJALL041402_G1
SJALL041403_G1
SJALL041407_G1
SJALL041408_G1
SJALL041409_G1
SJALL041410_G2
SJALL041413_G1
SJALL041414_G1
SJALL041416_G1
SJALL041418_G1
SJALL041421_G2
SJALL041422_G1
SJALL041423_G1
SJALL041424_G2
SJALL041425_G1
SJALL041426_G1
SJALL041428_G1
SJALL041431_G2
SJALL041432_G1
SJALL041436_G1
SJALL041439_G1
SJALL041440_G1
SJALL041442_G1
SJALL041443_G1
SJALL041444_G1
SJALL041450_G1
SJALL041452_G1
SJALL041453_G1
SJALL041455_G1
SJALL041456_G1
SJALL041459_G1
SJALL041842_G1
SJALL041843_G1
SJALL041846_G1
SJALL041847_G1
SJALL041848_G1
SJALL041849_G1
SJALL041850_G1
SJALL041851_G1
SJALL041852_G1
SJALL041856_G1
SJALL041857_G1
SJALL041858_G1
SJALL041859_G1
SJALL041862_G1
SJALL041863_G1
SJALL041864_G1
SJALL041865_G1
SJALL041866_G1
SJALL041867_G1
SJALL041868_G1
SJALL041869_G1
SJALL041870_G1
SJALL041871_G1
SJALL041872_G1
SJALL041873_G1
SJALL041874_G1
SJALL041876_G1
SJALL041877_G1
SJALL041878_G1
SJALL041880_G1
SJALL041881_G1
SJALL041883_G1
SJALL041885_G1
SJALL041886_G1
SJALL041888_G1
SJALL041889_G1
SJALL041891_G1
SJALL041894_G1
SJALL041896_G1
SJALL042474_G1
SJALL042477_G1
SJALL042479_G1
SJALL042480_G1
SJALL042489_G1
SJALL042490_G1
SJALL042498_G1
SJALL042503_G1
SJALL042508_G1
SJALL042529_G1
SJALL042532_G1
SJALL042535_G1
SJALL042537_G1
SJALL042539_G1
SJALL042545_G1
SJALL042546_G1
SJALL042547_G1
SJALL042618_G1
SJALL042619_G1
SJALL042652_G1
SJALL042654_G1
SJALL042656_G1
SJALL042658_G1
SJALL042662_G1
SJALL042663_G1
SJALL042664_G1
SJALL042665_G1
SJALL042666_G1
SJALL042667_G1
SJALL042668_G1
SJALL042669_G1
SJALL042672_G1
SJALL042674_G1
SJALL042676_G1
SJALL042678_G1
SJALL042679_G1
SJALL042680_G1
SJALL042681_G1
SJALL042683_G1
SJALL042684_G1
SJALL042685_G1
SJALL042687_G1
SJALL042688_G1
SJALL042689_G1
SJALL042692_G1
SJALL042693_G1
SJALL042694_G1
SJALL042697_G1
SJALL042698_G1
SJALL042699_G1
SJALL042857_G1
SJALL043461_G1
SJALL044963_G1
SJALL044964_G1
SJALL044967_G1
SJALL044972_G1
SJALL044974_G1
SJAML001422_G2
SJAML003313_G1
SJAML003318_G2
SJAML007003_G1
SJAML007006_G1
SJAML007008_G1
SJAML007012_G1
SJAML007013_G1
SJAML007029_G1
SJAML007047_G1
SJAML007090_G1
SJAML007095_G1
SJAML016547_G2
SJAML016555_G2
SJAML017891_G1
SJAML017892_G1
SJAML018554_G1
SJAML018555_G1
SJAML018556_G1
SJAML018557_G1
SJAML018559_G1
SJAML018562_G1
SJAML019101_G1
SJAML019102_G1
SJAML019103_G1
SJAML019104_G1
SJAML019106_G1
SJAML019107_G1
SJAML019109_G1
SJAML019110_G1
SJAML019111_G1
SJAML019113_G1
SJAML040967_G1
SJAML040990_G1
SJAML041465_G1
SJAML041466_G1
SJAML041469_G1
SJAML041471_G1
SJAML041898_G1
SJAML041899_G1
SJAML041900_G1
SJAML041901_G1
SJAML041902_G1
SJAML041904_G1
SJAML042478_G1
SJAML042540_G1
SJAML042700_G1
SJAML042701_G1
SJAML042702_G1
SJAML043970_G1
SJAUL041029_G1
SJBCC040981_G1
SJCA017893_G1
SJCA018563_G1
SJCA019117_G1
SJCA019119_G1
SJCA019193_G1
SJCA041905_G1
SJCA041980_G1
SJCA041981_G1
SJCA042494_G1
SJCML013234_G1
SJCNS001204_G1
SJCNS001206_G1
SJCNS001207_G1
SJCNS001212_G1
SJCNS001213_G1
SJCNS001215_G1
SJCNS001216_G1
SJCNS001218_G1
SJCNS001522_G1
SJCNS003205_G2
SJCNS003208_G1
SJCNS003216_G1
SJCNS003265_G1
SJCNS003704_G1
SJCNS003706_G1
SJCNS003708_G1
SJCNS017894_G1
SJCNS017896_G1
SJCNS017897_G1
SJCNS018564_G1
SJCNS018568_G1
SJCNS018573_G1
SJCNS018574_G1
SJCNS018579_G1
SJCNS018582_G1
SJCNS018585_G1
SJCNS018586_G1
SJCNS018591_G1
SJCNS018603_G1
SJCNS019123_G1
SJCNS019128_G1
SJCNS019130_G1
SJCNS019133_G1
SJCNS019134_G1
SJCNS019135_G1
SJCNS019136_G1
SJCNS019138_G1
SJCNS019140_G1
SJCNS019142_G1
SJCNS019143_G1
SJCNS019144_G1
SJCNS019146_G1
SJCNS019147_G1
SJCNS019149_G1
SJCNS019150_G1
SJCNS019151_G1
SJCNS019152_G1
SJCNS019156_G1
SJCNS019157_G1
SJCNS019159_G1
SJCNS019160_G1
SJCNS019161_G1
SJCNS019164_G1
SJCNS019166_G1
SJCNS019167_G1
SJCNS019168_G1
SJCNS019169_G1
SJCNS019170_G1
SJCNS019171_G1
SJCNS019172_G1
SJCNS019173_G1
SJCNS019175_G1
SJCNS019176_G1
SJCNS019178_G1
SJCNS019180_G1
SJCNS019183_G1
SJCNS019184_G1
SJCNS019185_G1
SJCNS019186_G1
SJCNS019191_G1
SJCNS019758_G1
SJCNS019759_G1
SJCNS019760_G1
SJCNS019766_G1
SJCNS040979_G1
SJCNS040989_G1
SJCNS040991_G1
SJCNS040996_G1
SJCNS040999_G1
SJCNS041000_G1
SJCNS041001_G1
SJCNS041002_G1
SJCNS041009_G1
SJCNS041035_G1
SJCNS041476_G1
SJCNS041479_G1
SJCNS041480_G1
SJCNS041485_G1
SJCNS041486_G1
SJCNS041487_G1
SJCNS041488_G1
SJCNS041489_G1
SJCNS041492_G1
SJCNS041496_G1
SJCNS041497_G1
SJCNS041906_G1
SJCNS041908_G1
SJCNS041910_G1
SJCNS041911_G1
SJCNS041916_G1
SJCNS041917_G1
SJCNS041918_G1
SJCNS041920_G1
SJCNS041921_G1
SJCNS041922_G1
SJCNS041924_G1
SJCNS041926_G1
SJCNS041928_G1
SJCNS041929_G1
SJCNS041930_G1
SJCNS041932_G1
SJCNS041933_G1
SJCNS041934_G1
SJCNS041938_G1
SJCNS041939_G1
SJCNS041940_G1
SJCNS041941_G1
SJCNS041942_G1
SJCNS041945_G1
SJCNS041946_G1
SJCNS041948_G1
SJCNS041951_G1
SJCNS041953_G1
SJCNS041955_G1
SJCNS041957_G1
SJCNS041958_G1
SJCNS041959_G1
SJCNS041962_G1
SJCNS041963_G1
SJCNS041964_G1
SJCNS041966_G1
SJCNS041968_G1
SJCNS041970_G1
SJCNS041971_G1
SJCNS041972_G1
SJCNS041974_G1
SJCNS041975_G1
SJCNS041977_G1
SJCNS041978_G1
SJCNS041979_G1
SJCNS042482_G1
SJCNS042483_G1
SJCNS042486_G1
SJCNS042492_G1
SJCNS042493_G1
SJCNS042496_G1
SJCNS042517_G1
SJCNS042527_G1
SJCNS042531_G1
SJCNS042534_G1
SJCNS042548_G1
SJCNS042549_G1
SJCNS042706_G1
SJCNS042709_G1
SJCNS042710_G1
SJCNS042856_G1
SJCNS043453_G1
SJCNS043922_G1
SJCNS043924_G1
SJCNS043930_G1
SJCNS043932_G1
SJCNS043942_G1
SJCNS043959_G1
SJCNS043967_G1
SJCNS044973_G1
SJCNS044975_G1
SJCNS044977_G1
SJCNS044979_G1
SJCRC042712_G1
SJEWS001301_G2
SJEWS017899_G1
SJEWS017900_G1
SJEWS018607_G1
SJEWS018610_G1
SJEWS018614_G1
SJEWS018615_G1
SJEWS018617_G1
SJEWS018621_G1
SJEWS018623_G1
SJEWS018625_G1
SJEWS019194_G1
SJEWS019195_G1
SJEWS019200_G1
SJEWS019202_G1
SJEWS019203_G1
SJEWS019204_G1
SJEWS019205_G1
SJEWS019206_G1
SJEWS019207_G1
SJEWS019210_G1
SJEWS019212_G1
SJEWS019213_G1
SJEWS019215_G1
SJEWS019216_G1
SJEWS019217_G1
SJEWS019768_G1
SJEWS019769_G1
SJEWS019770_G1
SJEWS019771_G1
SJEWS041500_G1
SJEWS041503_G1
SJEWS041505_G1
SJEWS041508_G1
SJEWS041510_G1
SJEWS041982_G1
SJEWS041983_G1
SJEWS041986_G1
SJEWS041988_G1
SJEWS041989_G1
SJEWS041990_G1
SJEWS041991_G1
SJEWS041993_G1
SJEWS041995_G1
SJEWS042485_G1
SJEWS042614_G1
SJEWS042715_G1
SJEWS042845_G1
SJEWS043451_G1
SJEWS043950_G1
SJGCT017901_G1
SJGCT018631_G1
SJGCT018632_G1
SJGCT018633_G1
SJGCT018634_G1
SJGCT018636_G1
SJGCT018637_G1
SJGCT018639_G1
SJGCT019222_G1
SJGCT019223_G1
SJGCT019225_G1
SJGCT019226_G1
SJGCT019232_G1
SJGCT019235_G1
SJGCT019238_G1
SJGCT019772_G1
SJGCT019773_G1
SJGCT019775_G1
SJGCT040984_G1
SJGCT041011_G1
SJGCT041512_G1
SJGCT041514_G1
SJGCT041515_G1
SJGCT041519_G1
SJGCT041520_G1
SJGCT041525_G1
SJGCT041996_G1
SJGCT041997_G1
SJGCT041998_G1
SJGCT042000_G1
SJGCT042001_G1
SJGCT042475_G1
SJGCT042487_G1
SJGCT042716_G1
SJGCT042718_G1
SJGCT042847_G1
SJGCT042887_G1
SJGCT043136_G1
SJGICT018824_G1
SJGICT042113_G1
SJGICT042114_G1
SJHB041013_G1
SJHIST011274_G1
SJHIST017902_G1
SJHIST018642_G1
SJHIST018646_G1
SJHIST019239_G1
SJHIST019240_G1
SJHIST019241_G1
SJHIST019242_G1
SJHIST019244_G1
SJHIST041020_G1
SJHIST042003_G1
SJHIST043920_G1
SJHL017903_G1
SJHL017904_G1
SJHL017906_G1
SJHL017907_G1
SJHL017909_G1
SJHL018648_G1
SJHL018649_G1
SJHL018651_G1
SJHL018656_G1
SJHL018660_G1
SJHL018661_G1
SJHL018663_G1
SJHL018664_G1
SJHL018665_G1
SJHL018667_G1
SJHL018671_G1
SJHL018672_G1
SJHL018675_G1
SJHL018682_G1
SJHL018685_G1
SJHL018690_G1
SJHL018692_G1
SJHL018693_G1
SJHL018696_G1
SJHL018699_G1
SJHL018705_G1
SJHL018711_G1
SJHL018714_G1
SJHL018715_G1
SJHL018717_G1
SJHL018718_G1
SJHL018719_G1
SJHL018721_G1
SJHL018723_G1
SJHL018724_G1
SJHL019246_G1
SJHL019248_G1
SJHL019249_G1
SJHL019251_G1
SJHL019252_G1
SJHL019253_G1
SJHL019254_G1
SJHL019258_G1
SJHL019259_G1
SJHL019262_G1
SJHL019263_G1
SJHL019264_G1
SJHL019265_G1
SJHL019266_G1
SJHL019267_G1
SJHL019268_G1
SJHL019271_G1
SJHL019273_G1
SJHL019275_G1
SJHL019278_G1
SJHL019279_G1
SJHL019280_G1
SJHL019281_G1
SJHL019283_G1
SJHL019285_G1
SJHL019286_G1
SJHL019287_G1
SJHL019288_G1
SJHL019290_G1
SJHL019291_G1
SJHL019293_G1
SJHL019294_G1
SJHL019295_G1
SJHL019296_G1
SJHL019299_G1
SJHL019304_G1
SJHL019305_G1
SJHL019306_G1
SJHL019307_G1
SJHL019308_G1
SJHL019309_G1
SJHL019311_G1
SJHL019312_G1
SJHL019313_G1
SJHL019314_G1
SJHL019317_G1
SJHL019319_G1
SJHL019320_G1
SJHL019321_G1
SJHL019322_G1
SJHL019323_G1
SJHL019324_G1
SJHL019328_G1
SJHL019329_G1
SJHL019332_G1
SJHL019334_G1
SJHL019335_G1
SJHL019336_G1
SJHL019337_G1
SJHL019338_G1
SJHL019341_G1
SJHL019342_G1
SJHL019343_G1
SJHL019345_G1
SJHL019347_G1
SJHL019349_G1
SJHL019350_G1
SJHL019351_G1
SJHL019352_G1
SJHL019353_G1
SJHL019355_G1
SJHL019357_G1
SJHL019359_G1
SJHL019360_G1
SJHL019363_G1
SJHL019777_G1
SJHL019778_G1
SJHL019783_G1
SJHL019786_G1
SJHL019787_G1
SJHL019790_G1
SJHL019791_G1
SJHL019793_G1
SJHL019794_G1
SJHL040992_G1
SJHL040995_G1
SJHL041003_G1
SJHL041004_G1
SJHL041019_G1
SJHL041526_G1
SJHL041529_G1
SJHL041534_G1
SJHL041535_G1
SJHL041537_G1
SJHL041538_G1
SJHL041539_G1
SJHL041540_G1
SJHL041541_G1
SJHL041543_G1
SJHL041545_G1
SJHL041546_G1
SJHL041548_G1
SJHL041552_G1
SJHL041553_G1
SJHL041556_G1
SJHL041559_G1
SJHL041560_G1
SJHL041562_G1
SJHL041564_G1
SJHL041570_G1
SJHL041572_G1
SJHL041577_G1
SJHL042005_G1
SJHL042007_G1
SJHL042009_G1
SJHL042010_G1
SJHL042011_G1
SJHL042013_G1
SJHL042014_G1
SJHL042016_G1
SJHL042017_G1
SJHL042018_G1
SJHL042019_G1
SJHL042021_G1
SJHL042022_G1
SJHL042023_G1
SJHL042024_G1
SJHL042026_G1
SJHL042028_G1
SJHL042031_G1
SJHL042033_G1
SJHL042034_G1
SJHL042035_G1
SJHL042036_G1
SJHL042040_G1
SJHL042041_G1
SJHL042042_G1
SJHL042043_G1
SJHL042046_G1
SJHL042050_G1
SJHL042052_G1
SJHL042469_G1
SJHL042473_G1
SJHL042476_G1
SJHL042526_G1
SJHL042544_G1
SJHL042615_G1
SJHL042720_G1
SJHL042721_G1
SJHL042723_G1
SJHL042724_G1
SJHL042725_G1
SJHL042726_G1
SJHL043452_G1
SJHL043457_G1
SJHL043900_G1
SJHL043902_G1
SJHL043904_G1
SJHL043905_G1
SJHL043912_G1
SJHL043933_G1
SJHL043937_G1
SJHL043941_G1
SJHL043948_G1
SJHL043966_G1
SJHL044960_G1
SJHL044965_G1
SJHL044976_G1
SJHM019549_G1
SJLGG001209_G2
SJLGG001217_G1
SJLGG011283_G1
SJLM017912_G1
SJLM018725_G1
SJLM019364_G1
SJLM019369_G1
SJLM019371_G1
SJLM019372_G1
SJLM019373_G1
SJLM019374_G1
SJLM019798_G1
SJLM043135_G1
SJLM043956_G1
SJMDS017914_G1
SJMEL017913_G1
SJMEL041584_G1
SJMEL042054_G1
SJMEL042055_G1
SJMEL042542_G1
SJMLL042512_G1
SJNBL006047_G2
SJNBL006048_G2
SJNBL006049_G2
SJNBL006063_G2
SJNBL017915_G2
SJNBL017916_G1
SJNBL017917_G1
SJNBL017918_G1
SJNBL017919_G1
SJNBL017920_G1
SJNBL017921_G1
SJNBL018735_G1
SJNBL018736_G1
SJNBL018738_G1
SJNBL018739_G2
SJNBL018741_G1
SJNBL018742_G1
SJNBL018748_G1
SJNBL018756_G1
SJNBL019381_G1
SJNBL019382_G1
SJNBL019383_G1
SJNBL019384_G1
SJNBL019386_G1
SJNBL019387_G1
SJNBL019388_G1
SJNBL019389_G1
SJNBL019390_G1
SJNBL019395_G1
SJNBL019396_G1
SJNBL019397_G1
SJNBL019399_G1
SJNBL019400_G1
SJNBL019404_G1
SJNBL019405_G1
SJNBL019408_G1
SJNBL019409_G1
SJNBL019410_G1
SJNBL019412_G1
SJNBL019415_G1
SJNBL019416_G1
SJNBL019417_G1
SJNBL019421_G1
SJNBL019423_G1
SJNBL019425_G1
SJNBL019426_G1
SJNBL019427_G1
SJNBL019429_G1
SJNBL019430_G1
SJNBL019432_G1
SJNBL019434_G1
SJNBL019435_G1
SJNBL019437_G1
SJNBL019438_G1
SJNBL019439_G1
SJNBL019440_G1
SJNBL019802_G1
SJNBL019803_G1
SJNBL019804_G1
SJNBL040973_G1
SJNBL041048_G1
SJNBL041590_G1
SJNBL041591_G1
SJNBL041592_G1
SJNBL041593_G1
SJNBL041596_G1
SJNBL041598_G1
SJNBL041599_G1
SJNBL041600_G1
SJNBL041601_G1
SJNBL041602_G1
SJNBL041606_G1
SJNBL042061_G1
SJNBL042062_G1
SJNBL042509_G1
SJNBL042538_G1
SJNBL042730_G1
SJNBL042851_G1
SJNBL043965_G1
SJNHL010139_G1
SJNHL017923_G1
SJNHL017924_G1
SJNHL017925_G1
SJNHL017927_G1
SJNHL017928_G1
SJNHL017929_G1
SJNHL017930_G1
SJNHL017931_G1
SJNHL018758_G1
SJNHL018761_G1
SJNHL018764_G1
SJNHL018768_G1
SJNHL018772_G1
SJNHL018773_G1
SJNHL018779_G1
SJNHL018781_G1
SJNHL018786_G1
SJNHL018794_G1
SJNHL019441_G1
SJNHL019442_G1
SJNHL019443_G1
SJNHL019444_G1
SJNHL019445_G1
SJNHL019446_G1
SJNHL019447_G1
SJNHL019451_G1
SJNHL019452_G1
SJNHL019455_G1
SJNHL019456_G1
SJNHL019457_G1
SJNHL019458_G1
SJNHL019461_G1
SJNHL019462_G1
SJNHL019463_G1
SJNHL019464_G1
SJNHL019466_G1
SJNHL019467_G1
SJNHL019468_G1
SJNHL019469_G1
SJNHL019471_G1
SJNHL019472_G1
SJNHL019473_G1
SJNHL019475_G1
SJNHL019476_G1
SJNHL019477_G1
SJNHL019480_G1
SJNHL019481_G1
SJNHL019483_G1
SJNHL019484_G1
SJNHL019485_G1
SJNHL019487_G1
SJNHL019488_G1
SJNHL019490_G1
SJNHL019491_G1
SJNHL019493_G1
SJNHL019494_G1
SJNHL019496_G1
SJNHL019498_G1
SJNHL019810_G1
SJNHL019811_G1
SJNHL040952_G1
SJNHL040986_G1
SJNHL040994_G1
SJNHL040997_G1
SJNHL041021_G1
SJNHL041023_G1
SJNHL041608_G1
SJNHL041612_G1
SJNHL041613_G1
SJNHL041615_G1
SJNHL041618_G1
SJNHL041619_G1
SJNHL041620_G1
SJNHL041621_G1
SJNHL041622_G1
SJNHL041627_G1
SJNHL041628_G1
SJNHL041632_G1
SJNHL041633_G1
SJNHL042064_G1
SJNHL042065_G1
SJNHL042066_G1
SJNHL042069_G1
SJNHL042070_G1
SJNHL042072_G1
SJNHL042074_G1
SJNHL042076_G1
SJNHL042078_G1
SJNHL042079_G1
SJNHL042081_G1
SJNHL042082_G1
SJNHL042085_G1
SJNHL042086_G1
SJNHL042087_G1
SJNHL042090_G1
SJNHL042091_G1
SJNHL042092_G1
SJNHL042470_G1
SJNHL042519_G1
SJNHL042731_G1
SJNHL042733_G1
SJNHL042735_G1
SJNHL042737_G1
SJNHL042738_G1
SJNHL042739_G1
SJNHL042740_G1
SJNHL042741_G1
SJNHL042742_G1
SJNHL042745_G1
SJNHL042746_G1
SJNHL042747_G1
SJNHL042749_G1
SJNHL042751_G1
SJNHL042753_G1
SJNHL042755_G1
SJNHL042858_G1
SJNHL043963_G1
SJNM041634_G1
SJNM042094_G1
SJNPC019501_G1
SJNPC019502_G1
SJNPC019503_G1
SJNPC019505_G1
SJNPC019800_G1
SJNPC041585_G1
SJNPC041586_G1
SJNPC041587_G1
SJNPC041588_G1
SJNPC042056_G1
SJNPC042057_G1
SJNPC042536_G1
SJNPCA018728_G1
SJOS004903_G2
SJOS004912_G2
SJOS017932_G1
SJOS017934_G1
SJOS017935_G1
SJOS018805_G1
SJOS018806_G1
SJOS018807_G1
SJOS018809_G1
SJOS018810_G1
SJOS018813_G1
SJOS018814_G1
SJOS019507_G1
SJOS019509_G1
SJOS019511_G1
SJOS019512_G1
SJOS019513_G1
SJOS019514_G1
SJOS019516_G1
SJOS019517_G1
SJOS019518_G1
SJOS019521_G1
SJOS019522_G1
SJOS019524_G1
SJOS019527_G1
SJOS019528_G1
SJOS019529_G1
SJOS019530_G1
SJOS019536_G1
SJOS019537_G1
SJOS019540_G1
SJOS019541_G1
SJOS019542_G1
SJOS019543_G1
SJOS019546_G1
SJOS019548_G1
SJOS019813_G1
SJOS019814_G1
SJOS041007_G1
SJOS041635_G1
SJOS041638_G1
SJOS041639_G1
SJOS041640_G1
SJOS042099_G1
SJOS042101_G1
SJOS042102_G1
SJOS042103_G1
SJOS042106_G1
SJOS042491_G1
SJOS042514_G1
SJOS042616_G1
SJOS042757_G1
SJOS042759_G1
SJPGL042495_G1
SJRB017936_G1
SJRB017937_G1
SJRB017938_G1
SJRB017939_G1
SJRB017940_G1
SJRB018827_G1
SJRB018828_G1
SJRB018830_G1
SJRB018833_G1
SJRB018834_G1
SJRB019554_G1
SJRB019555_G1
SJRB019557_G1
SJRB019558_G1
SJRB019560_G1
SJRB019561_G1
SJRB019562_G1
SJRB019564_G1
SJRB019566_G1
SJRB019570_G1
SJRB019572_G1
SJRB019573_G1
SJRB019575_G1
SJRB019815_G1
SJRB019817_G1
SJRB019818_G1
SJRB019823_G1
SJRB019824_G1
SJRB019828_G1
SJRB040951_G1
SJRB041649_G1
SJRB041651_G1
SJRB041653_G1
SJRB041654_G1
SJRB041656_G1
SJRB041658_G1
SJRB041659_G1
SJRB041661_G1
SJRB041663_G1
SJRB041665_G1
SJRB041667_G1
SJRB041669_G1
SJRB041670_G1
SJRB041671_G1
SJRB042541_G1
SJRB043915_G1
SJRB043934_G1
SJRB043947_G1
SJRB043952_G1
SJRCC019114_G1
SJRCC019115_G1
SJRHB003902_G2
SJRHB003906_G2
SJRHB003928_G2
SJRHB003933_G2
SJRHB003947_G2
SJRHB003948_G2
SJRHB003949_G2
SJRHB003950_G2
SJRHB017941_G1
SJRHB017943_G1
SJRHB017944_G1
SJRHB017945_G1
SJRHB017946_G1
SJRHB018838_G1
SJRHB018839_G1
SJRHB018840_G1
SJRHB018846_G1
SJRHB018849_G1
SJRHB019576_G1
SJRHB019579_G1
SJRHB019580_G1
SJRHB019582_G1
SJRHB019583_G1
SJRHB019584_G1
SJRHB019586_G1
SJRHB019587_G1
SJRHB019588_G1
SJRHB019589_G1
SJRHB019590_G1
SJRHB019592_G1
SJRHB019593_G1
SJRHB019594_G1
SJRHB019596_G1
SJRHB019599_G1
SJRHB019831_G1
SJRHB040975_G1
SJRHB041015_G1
SJRHB041677_G1
SJRHB041678_G1
SJRHB041680_G1
SJRHB041682_G1
SJRHB041684_G1
SJRHB041687_G1
SJRHB041690_G1
SJRHB042117_G1
SJRHB042118_G1
SJRHB042119_G1
SJRHB042122_G1
SJRHB042124_G1
SJRHB042481_G1
SJRHB042497_G1
SJRHB042499_G1
SJRHB042500_G1
SJRHB042762_G1
SJRHB042764_G1
SJRHB042765_G1
SJRHB043458_G1
SJRHB046_G
SJST019550_G1
SJST019552_G1
SJST042112_G1
SJST043961_G1
SJSTS017947_G1
SJSTS017948_G1
SJSTS017949_G1
SJSTS017950_G1
SJSTS017951_G1
SJSTS017952_G1
SJSTS018852_G1
SJSTS018855_G1
SJSTS018858_G1
SJSTS018859_G1
SJSTS018864_G1
SJSTS018867_G1
SJSTS018868_G1
SJSTS018870_G1
SJSTS018872_G1
SJSTS019600_G1
SJSTS019601_G1
SJSTS019602_G1
SJSTS019605_G1
SJSTS019607_G1
SJSTS019608_G1
SJSTS019609_G1
SJSTS019610_G1
SJSTS019612_G1
SJSTS019614_G1
SJSTS019616_G1
SJSTS019617_G1
SJSTS019618_G1
SJSTS019619_G1
SJSTS019622_G1
SJSTS019626_G1
SJSTS019627_G1
SJSTS019836_G1
SJSTS019837_G1
SJSTS019838_G1
SJSTS041010_G1
SJSTS041018_G1
SJSTS041647_G1
SJSTS041692_G1
SJSTS042126_G1
SJSTS042128_G1
SJSTS042129_G1
SJSTS042132_G1
SJSTS042133_G1
SJSTS042136_G1
SJSTS042513_G1
SJSTS042766_G1
SJSTS042767_G1
SJSTS043137_G1
SJSTS043936_G1
SJTALL005069_G3
SJWLM017953_G2
SJWLM017955_G1
SJWLM017956_G1
SJWLM017957_G1
SJWLM017958_G1
SJWLM017959_G1
SJWLM017960_G1
SJWLM017961_G1
SJWLM017962_G1
SJWLM017963_G1
SJWLM018877_G1
SJWLM018878_G1
SJWLM018879_G1
SJWLM018882_G1
SJWLM018884_G1
SJWLM018887_G1
SJWLM018888_G1
SJWLM018891_G1
SJWLM018893_G1
SJWLM018897_G1
SJWLM018900_G1
SJWLM018902_G1
SJWLM018903_G1
SJWLM018904_G1
SJWLM018907_G1
SJWLM018908_G1
SJWLM018910_G1
SJWLM018911_G1
SJWLM018912_G1
SJWLM018914_G1
SJWLM018915_G1
SJWLM018919_G1
SJWLM018920_G1
SJWLM019628_G1
SJWLM019629_G1
SJWLM019631_G1
SJWLM019632_G1
SJWLM019633_G1
SJWLM019634_G1
SJWLM019635_G1
SJWLM019639_G1
SJWLM019640_G1
SJWLM019641_G1
SJWLM019643_G1
SJWLM019644_G1
SJWLM019647_G1
SJWLM019648_G1
SJWLM019649_G1
SJWLM019652_G1
SJWLM019654_G1
SJWLM019655_G1
SJWLM019659_G1
SJWLM019660_G1
SJWLM019662_G1
SJWLM019663_G1
SJWLM019666_G1
SJWLM019668_G1
SJWLM019670_G1
SJWLM019672_G1
SJWLM019674_G1
SJWLM019677_G1
SJWLM019678_G1
SJWLM019680_G1
SJWLM019685_G1
SJWLM019687_G1
SJWLM019689_G1
SJWLM019690_G1
SJWLM019691_G1
SJWLM019692_G1
SJWLM019694_G1
SJWLM019698_G1
SJWLM019701_G1
SJWLM019702_G1
SJWLM019704_G1
SJWLM019705_G1
SJWLM019708_G1
SJWLM019844_G1
SJWLM019848_G1
SJWLM040965_G1
SJWLM040988_G1
SJWLM041025_G1
SJWLM041694_G1
SJWLM041696_G1
SJWLM041697_G1
SJWLM041699_G1
SJWLM041700_G1
SJWLM041702_G1
SJWLM041704_G1
SJWLM041706_G1
SJWLM041707_G1
SJWLM041708_G1
SJWLM041710_G1
SJWLM041711_G1
SJWLM041712_G1
SJWLM041714_G1
SJWLM041715_G1
SJWLM041716_G1
SJWLM041717_G1
SJWLM041718_G1
SJWLM041719_G1
SJWLM041720_G1
SJWLM042138_G1
SJWLM042139_G1
SJWLM042140_G1
SJWLM042502_G1
SJWLM042533_G1
SJWLM042768_G1
SJWLM042861_G1
SJWLM043128_G1
SJWLM043455_G1
SJWLM043895_G1
SJWLM043918_G1
SJWLM043919_G1
SJWLM043921_G1
SJWLM043923_G1
SJWLM043955_G1
SJWLM044962_G1
